# Supplementary material for: Interruption of KLF5 acetylation promotes PTEN-deficient prostate cancer progression by reprogramming cancer-associated fibroblasts
Source: PubMed Central journal article supplement (PMC11245161; doi:10.1172/jci175949), 2024-05-23

# Raw Data of Blots

Fig. 5A-DU 145

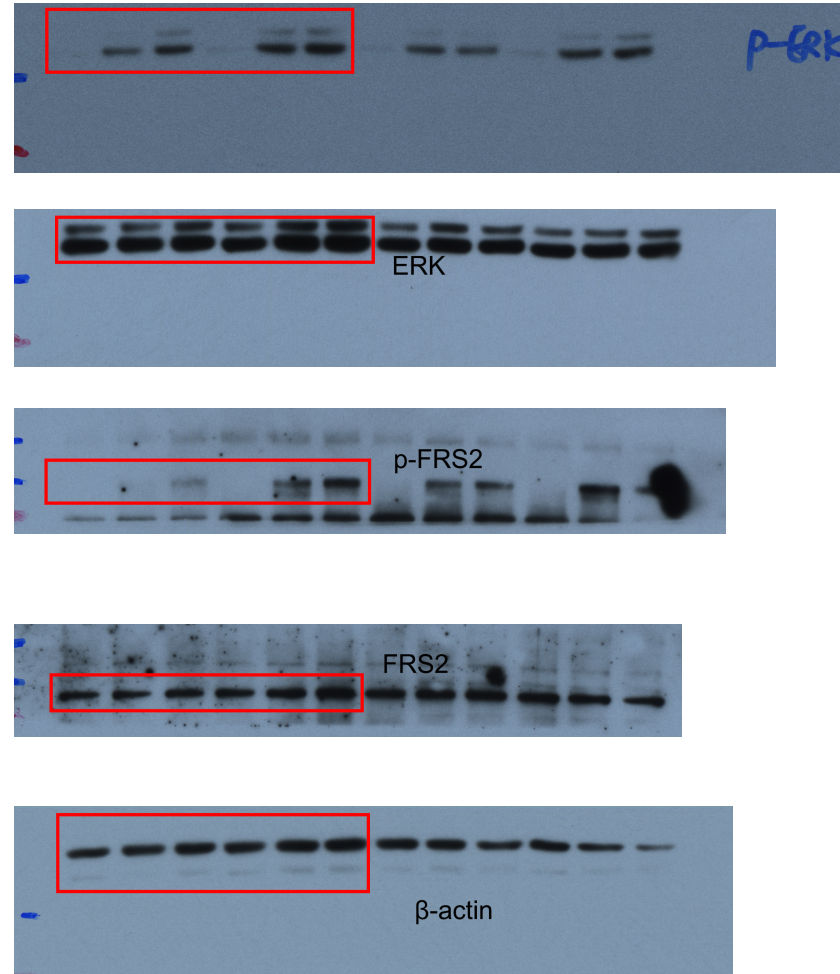

# Fig. 5A-PC-3

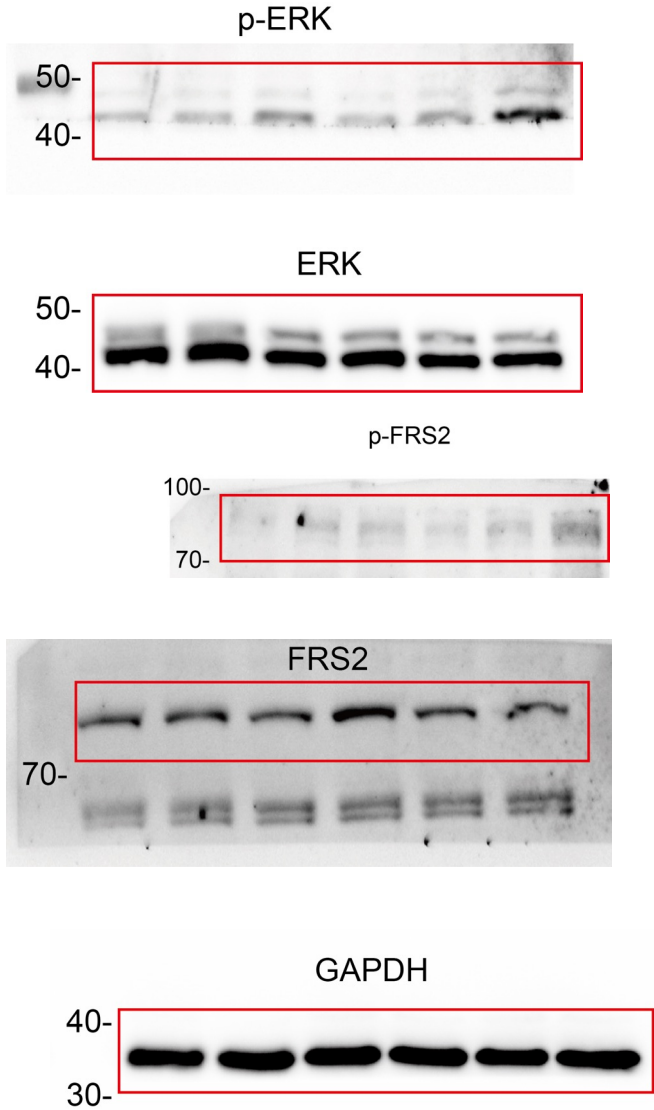

Fig. 5F

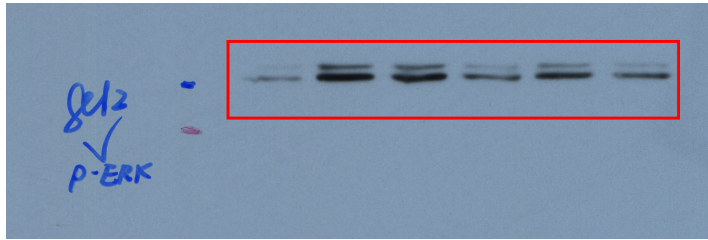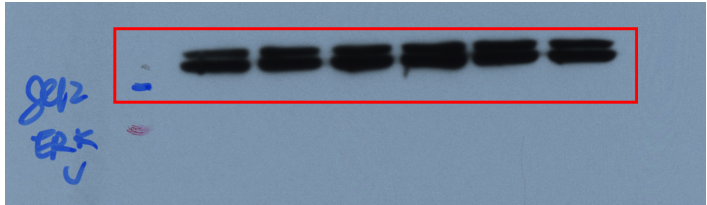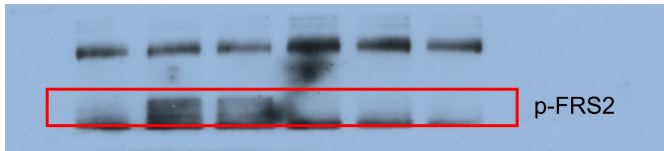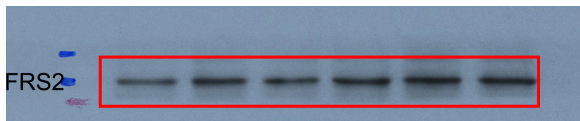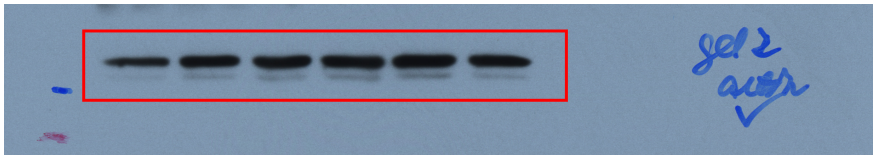

Fig. 5G

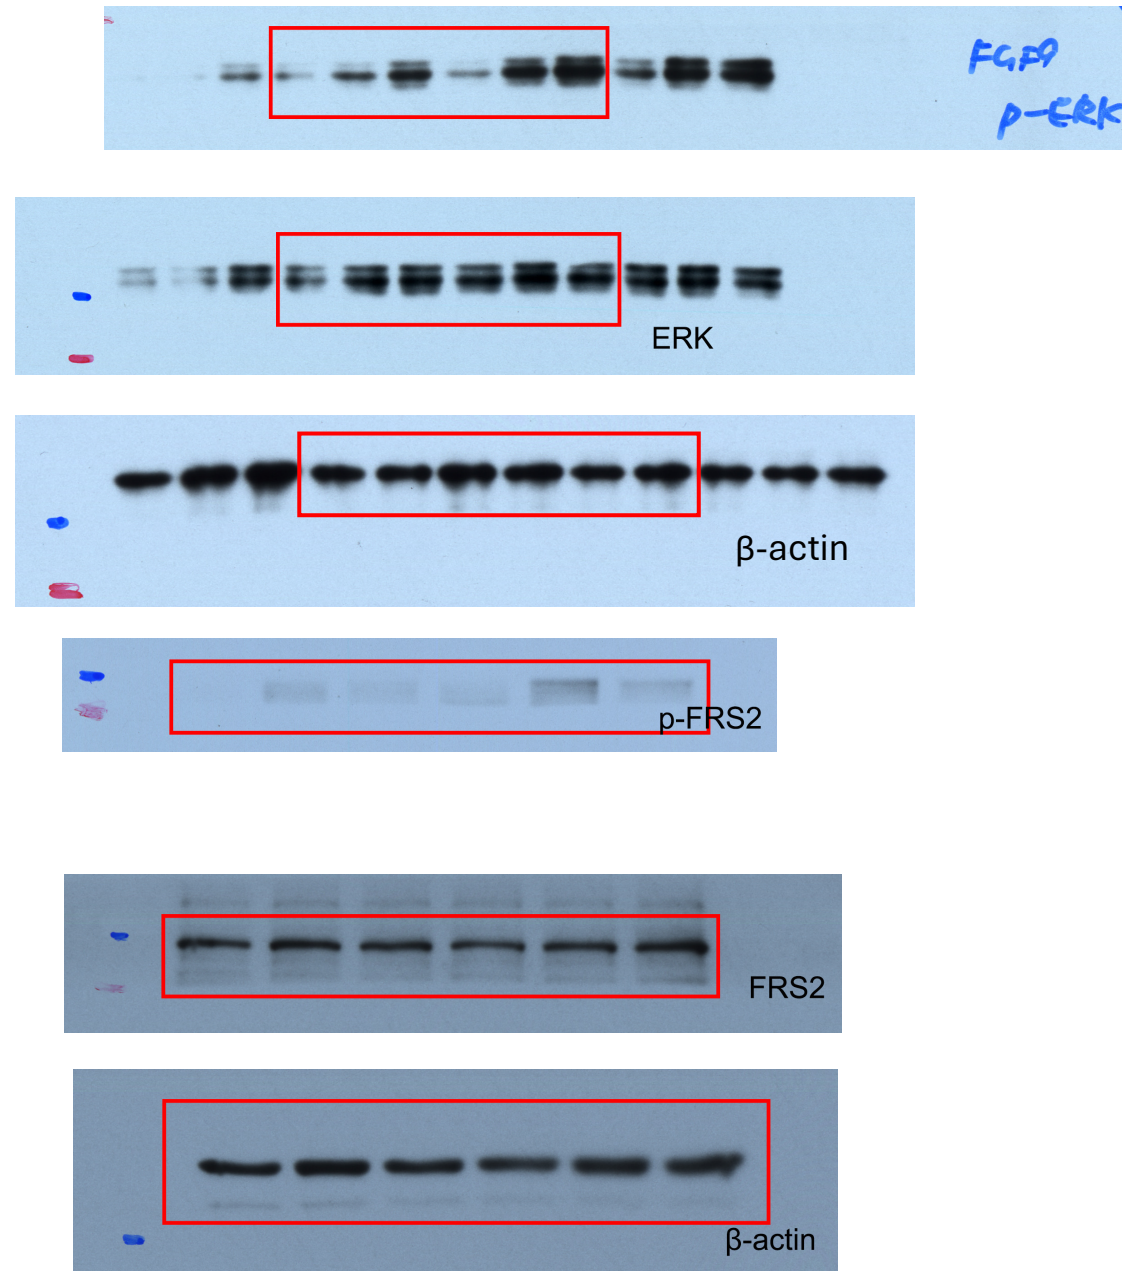

Fig. 8D

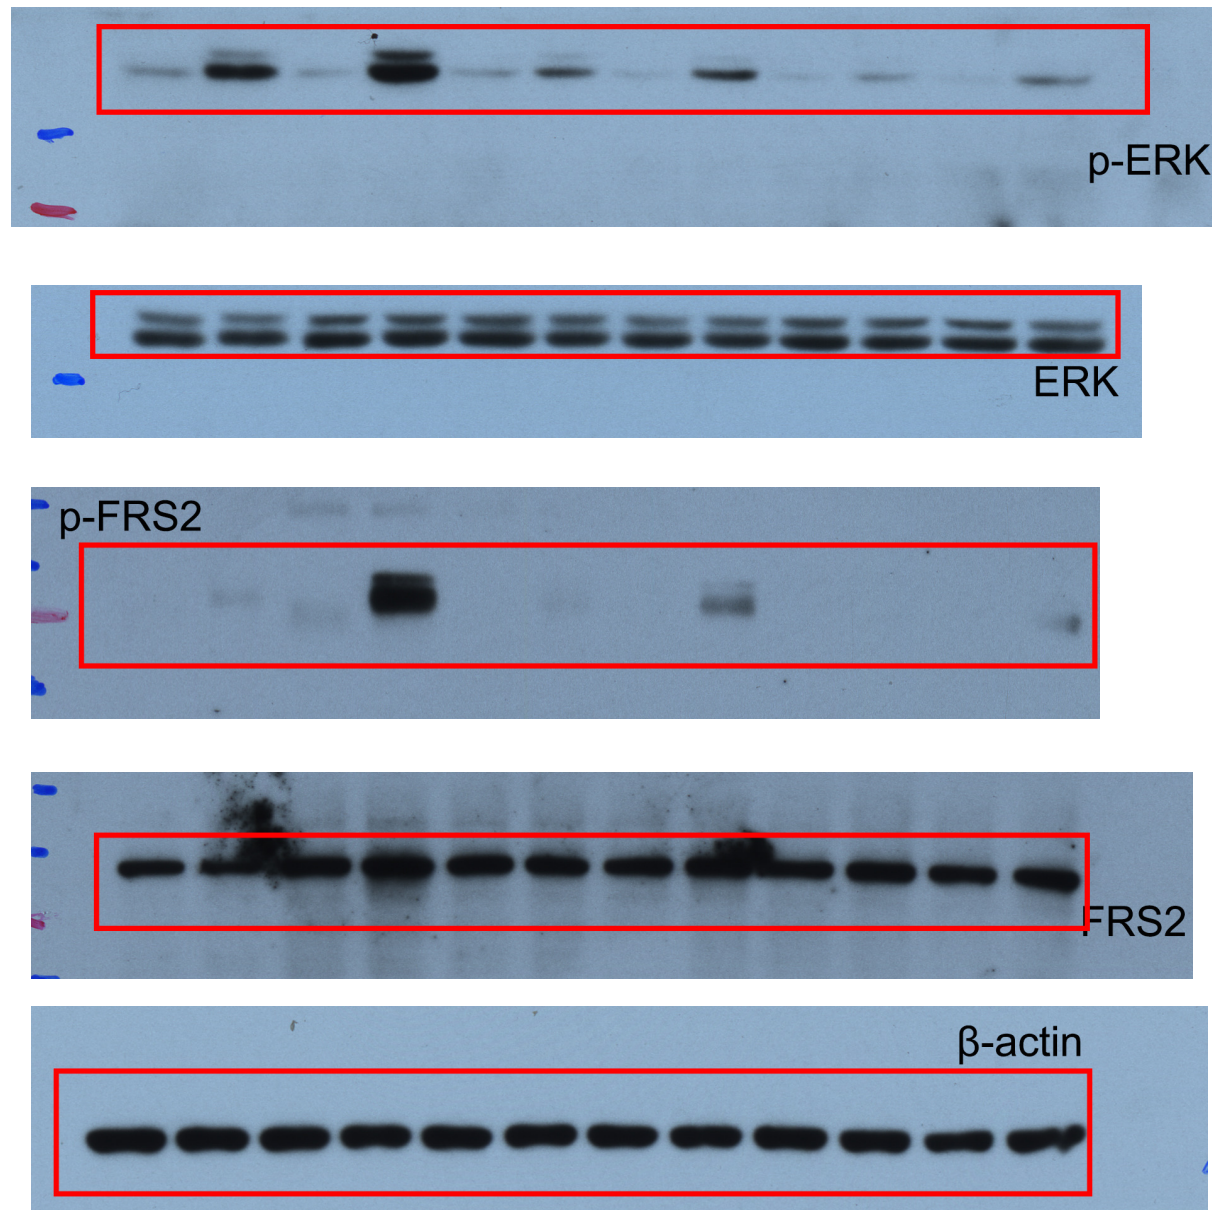

Fig. S1D

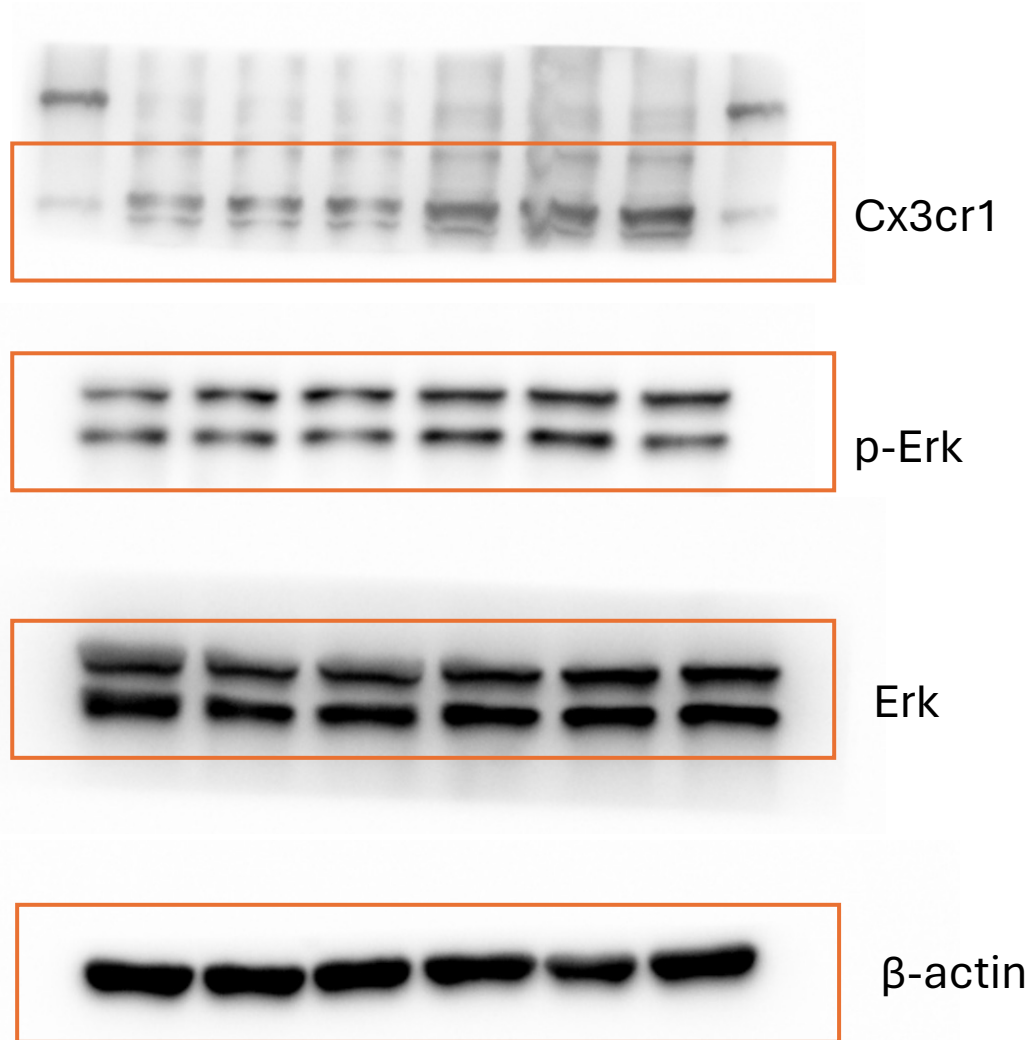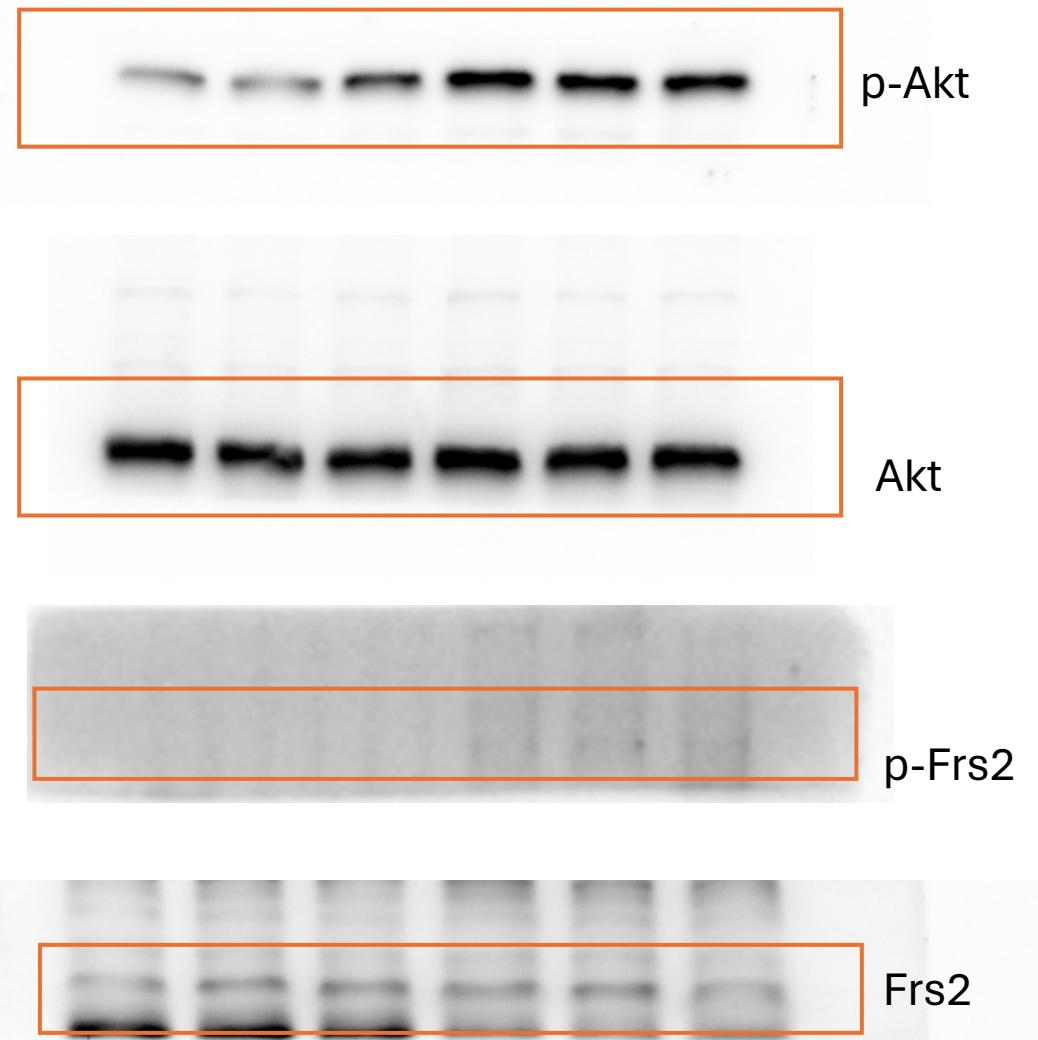

Fig. S4C

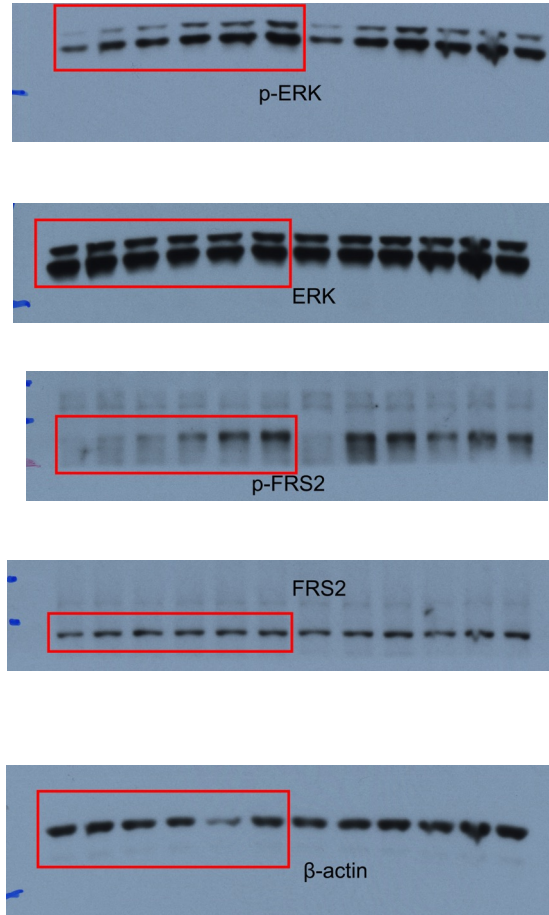



Fig. S4D

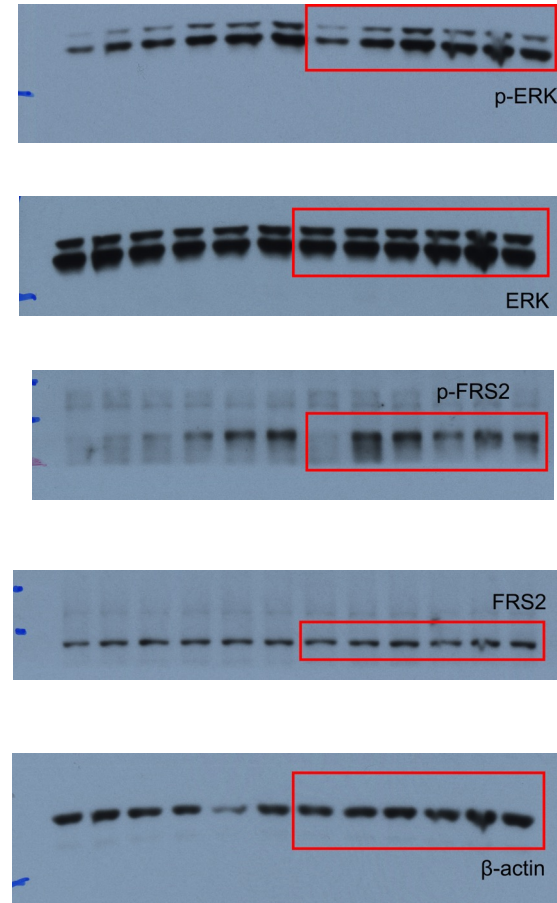

Fig. S4E

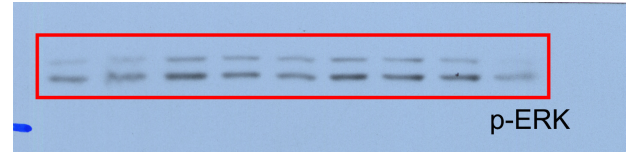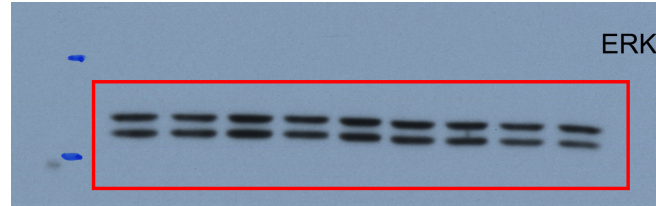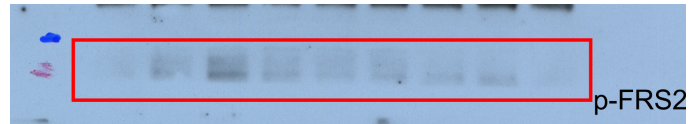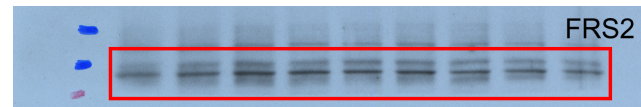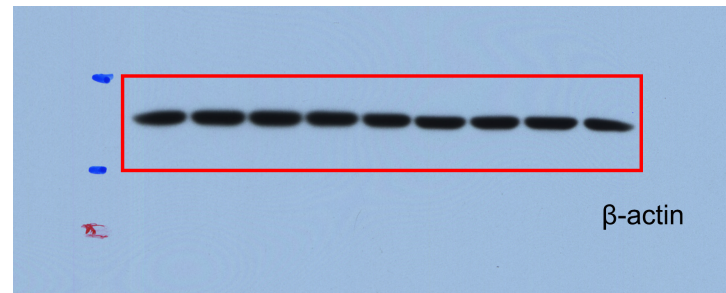

# Fig. S8C

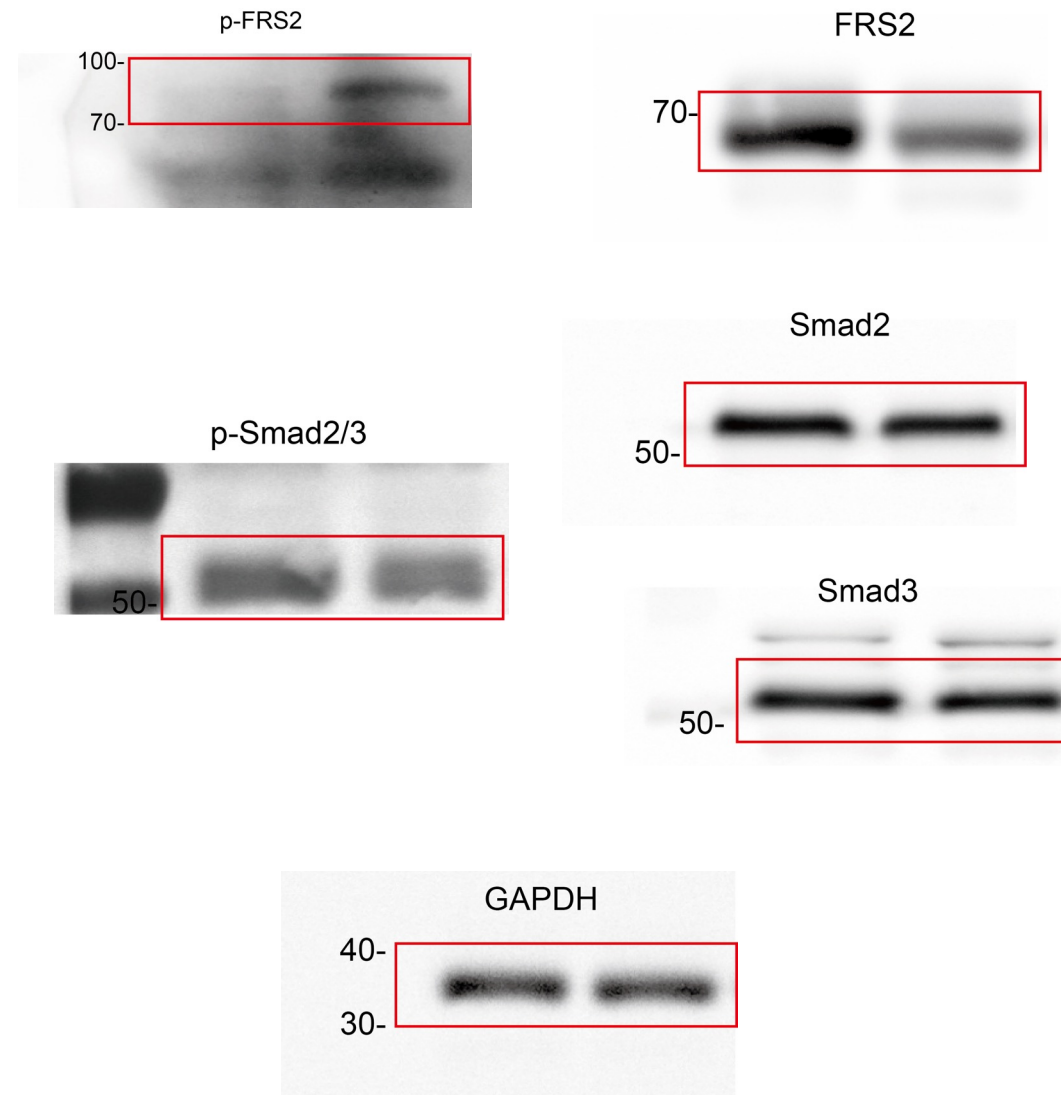

Supplement: jci-134-175949-s065.pdf [file jci-134-175949-s065.pdf]
