# Supplementary material for: Interruption of KLF5 acetylation promotes PTEN-deficient prostate cancer progression by reprogramming cancer-associated fibroblasts
Source: PubMed Central journal article supplement (PMC11245161; doi:10.1172/jci175949), 2024-05-23
Supplement: jci-134-175949-s063.pdf [file jci-134-175949-s063.pdf]

# Supplemental information

**Interruption of KLF5 acetylation promotes *PTEN*-deficient prostate cancer progression by reprogramming cancer-associated fibroblasts**

**Zhang et al.**

- I. Supplemental Figures**
- II. Supplemental Tables**
- III. Supplemental Datasets**
- IV. Supplemental Methods**

# I. Supplemental Figures

## Supplemental Figure 1

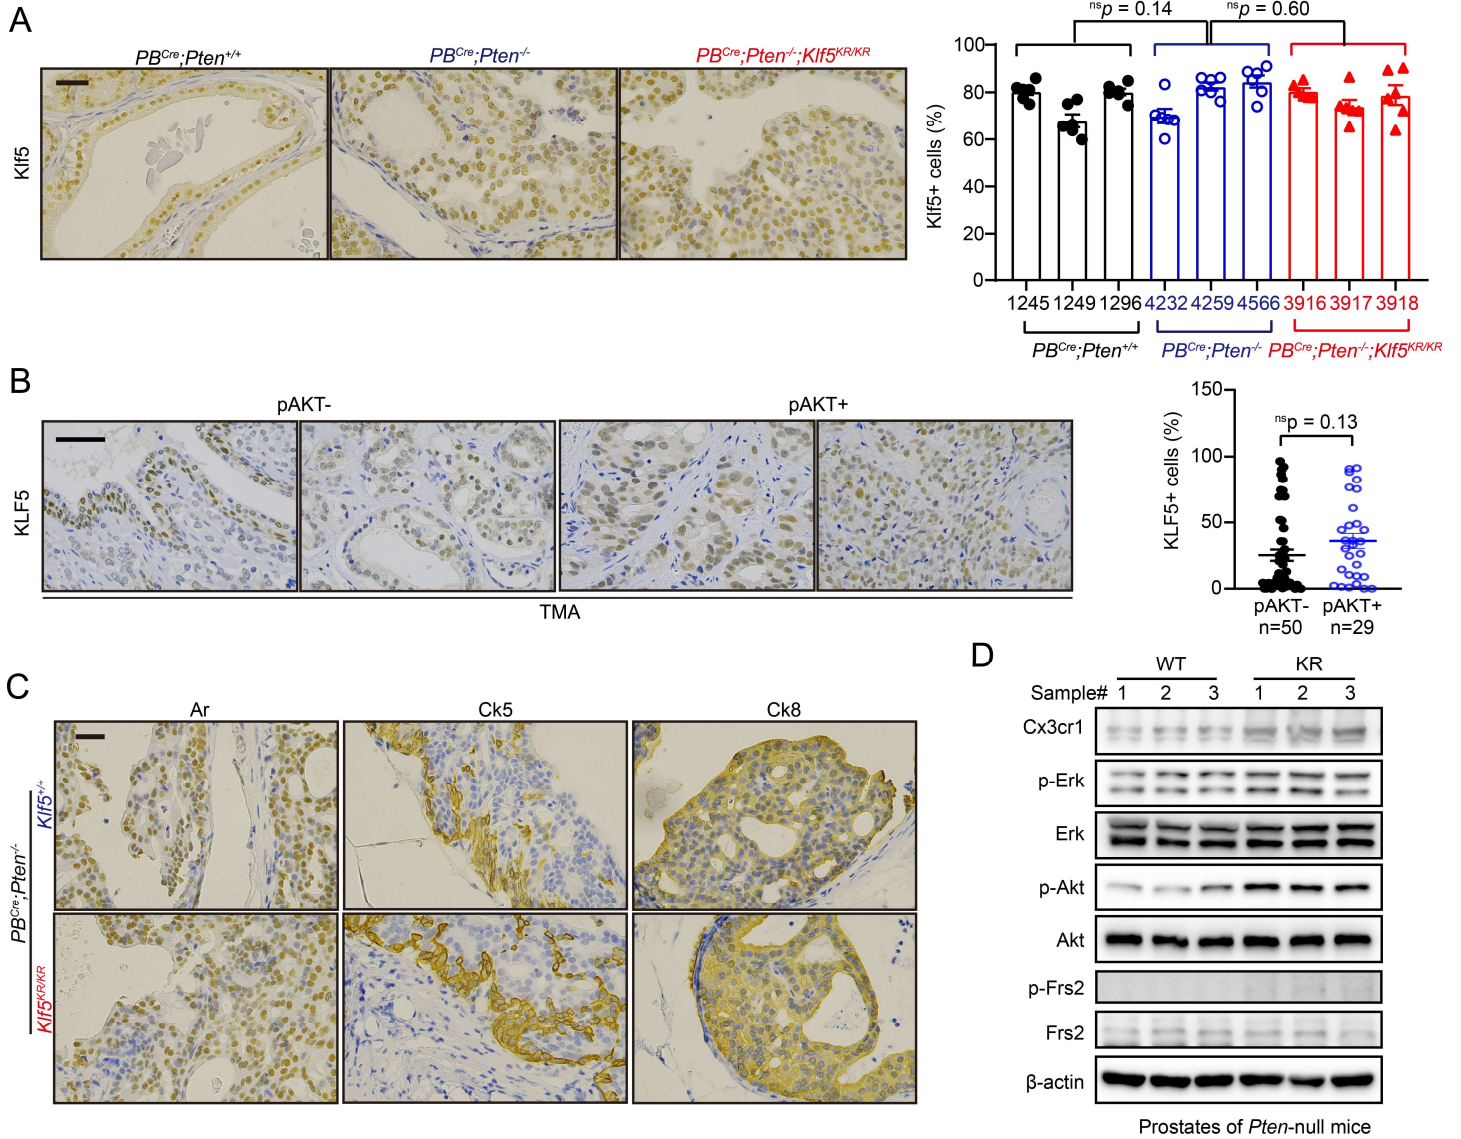

**Supplemental Figure 1. *Klf5*<sup>KR</sup> knockin does not alter the expression levels of total *Klf5* but activates *Fgfr1* signaling.** (A) IHC staining of *Klf5* in 4-month-old mice with indicated genotypes; (B) IHC staining of KLF5 in human prostate cancer specimens with or without AKT activation in TMAs. (C) IHC staining of epithelial markers such as Ar, Ck5 and Ck8 with indicated genotypes. (D) *Klf5*<sup>KR</sup> knockin activates *Fgfr1* signaling in the context of *Pten* knockout, as indicated by Western blotting assay. Scale bars, 50 μm.

# Supplemental Figure 2

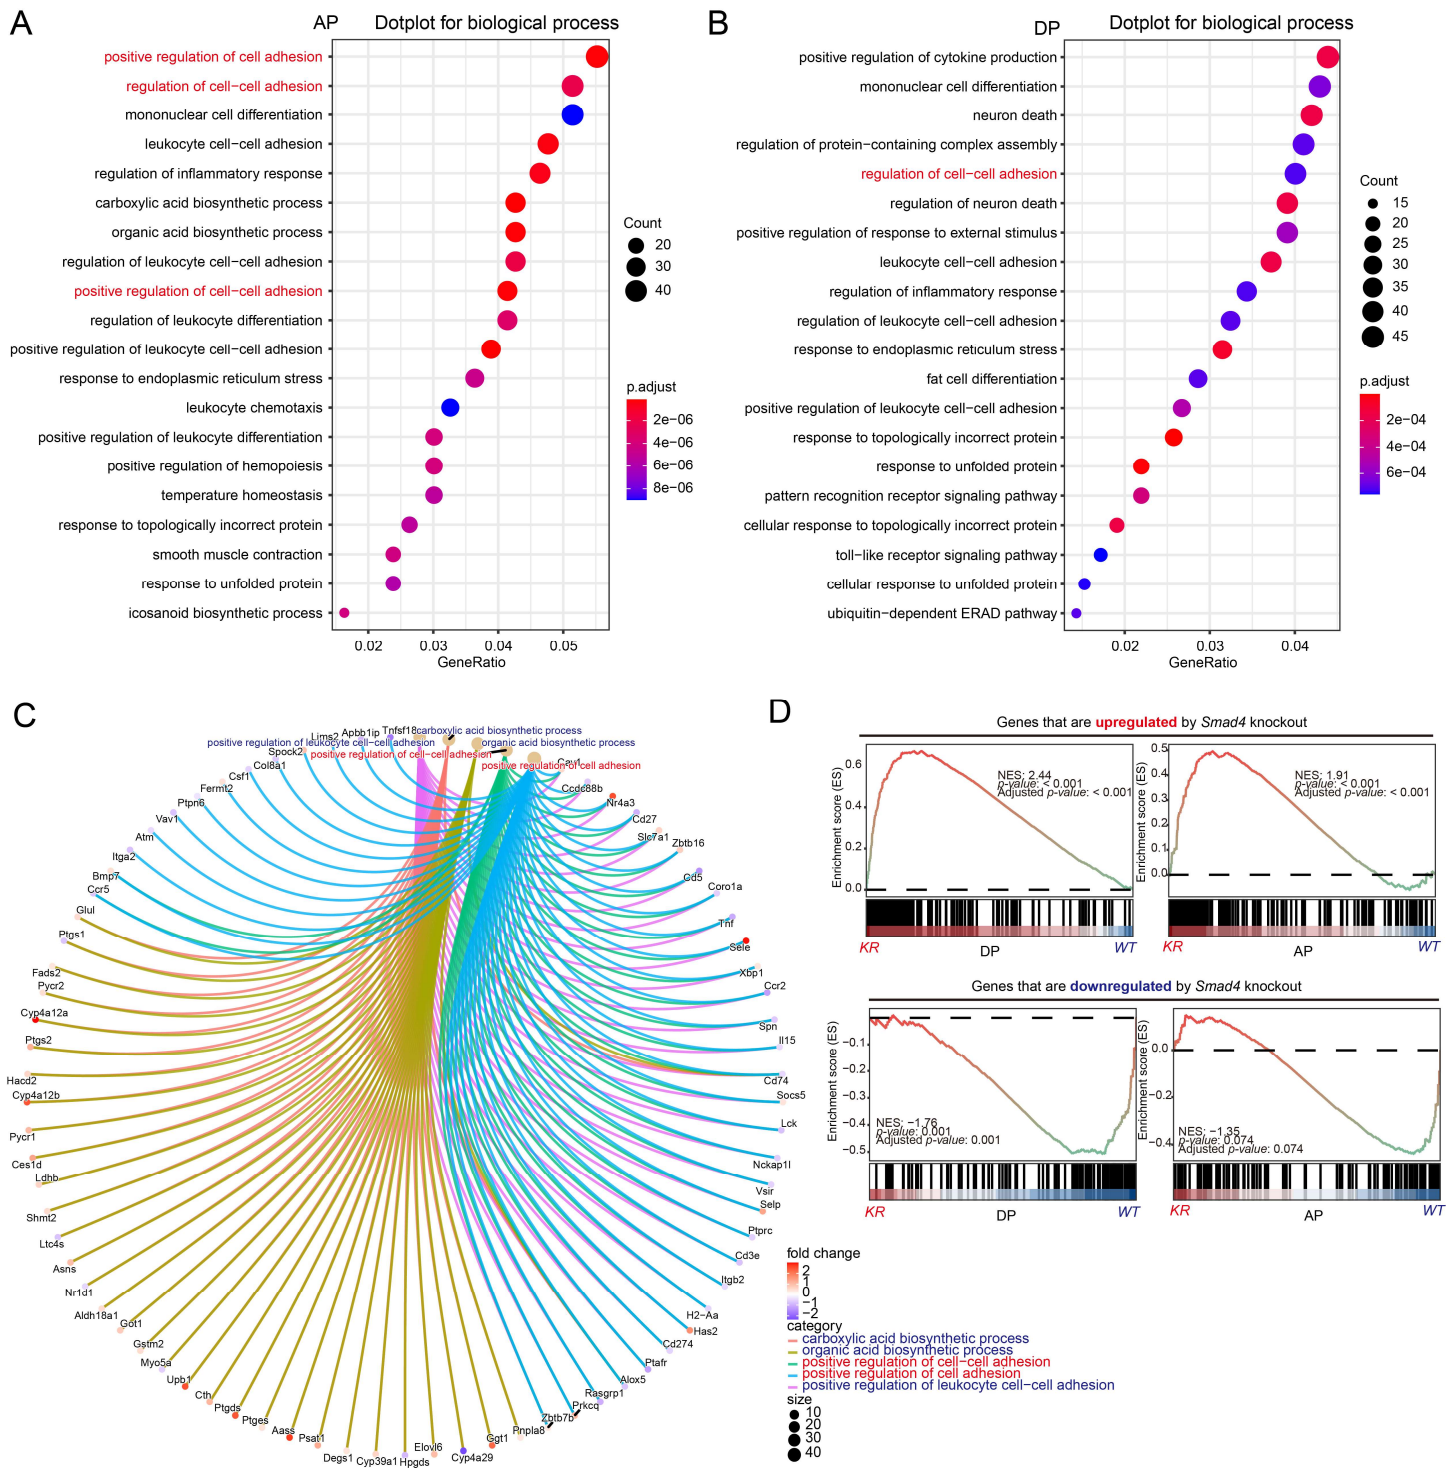

**Supplemental Figure 2. Functional annotations of differential gene expression caused by the interruption of *Klf5* acetylation in *Pten*-deficient prostate tumor cells. (A, B) Top 20 significant (adjusted  $p$ -value < 0.05) Gene Ontology (GO) Biological Process sets in anterior prostates (AP, A) and dorsal prostates (DP, B). (C) Central network plot (CNET plot) for the most significantly enriched GO Biological Process sets and their genes (adjusted  $p$ -value < 0.05) associated with deacetylated *Klf5* in AP. (D) The differentially expressed genes caused by *Klf5*<sup>KR</sup> knockin were closely associated with the altered genes caused by SMAD4 knockout (Nature, 2011), as indicated by GSEA.**



# Supplemental Figure 3

A

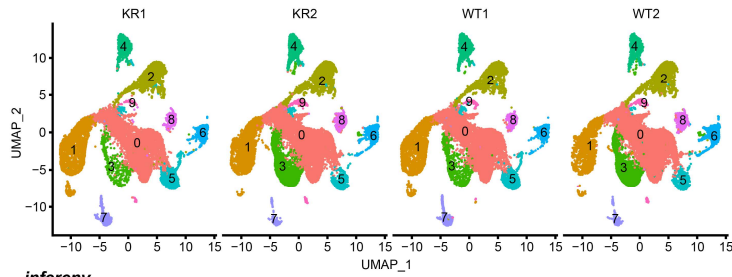

D

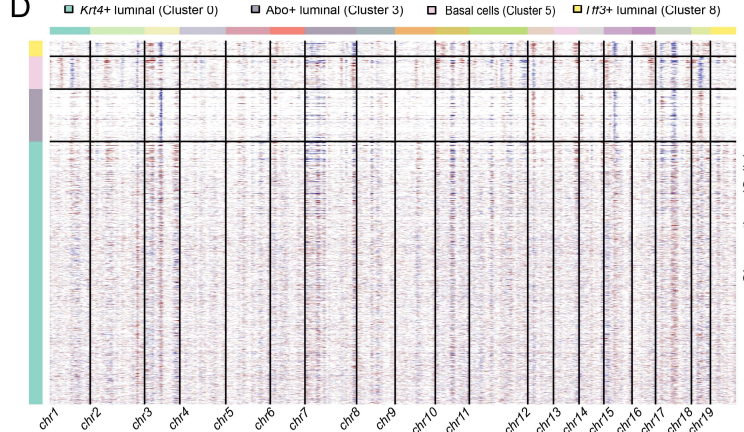

B

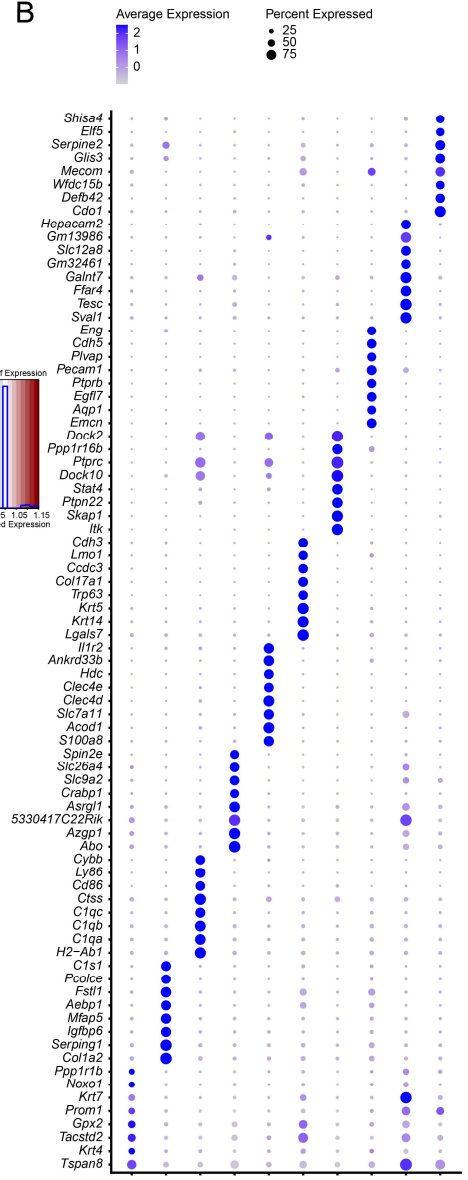

E

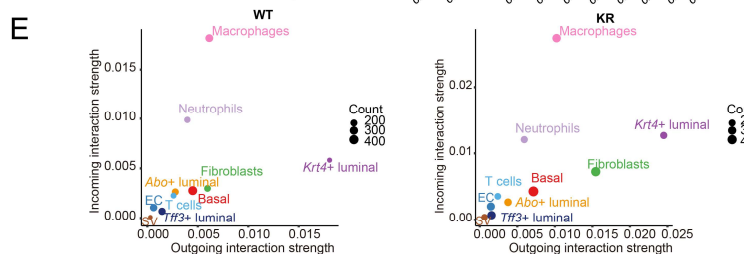

F

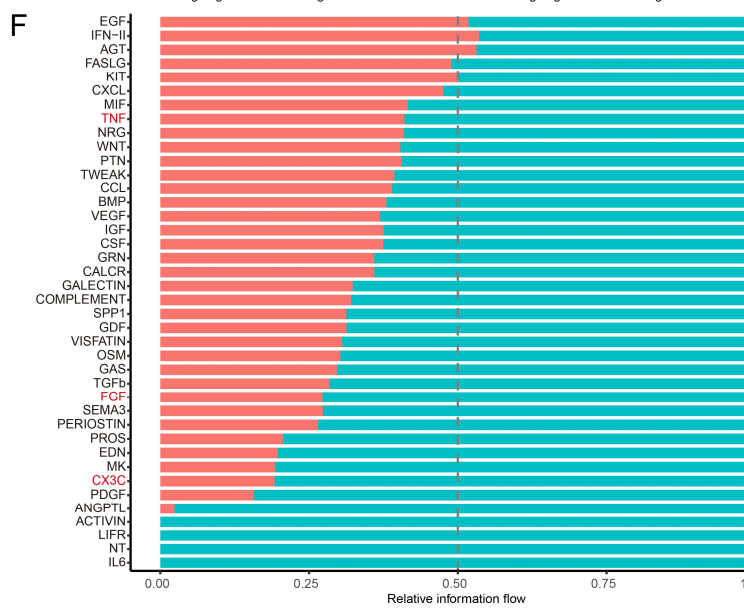

C

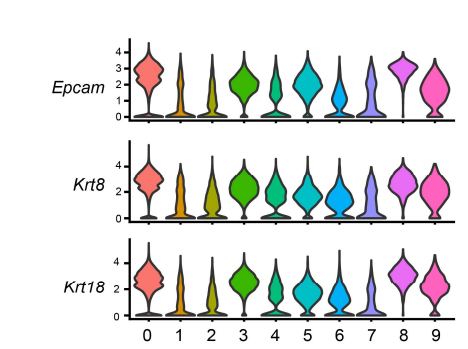

**Supplemental Figure 3. Single cell transcriptomic assay clusters different cell types in *Pten*-deficient mouse prostates.** (A) The distribution of 10 cell clusters in four mouse prostates, as visualized by UMAP. (B) Dot plots of the top 10 marker genes of each cluster in the scRNA-seq of mouse prostates (n = 61713 cells). The annotation of each cluster is shown in Fig. 4. (C) Representative markers of luminal cells are shown as violin plots. (D) *Infercnv* analysis of prostate epithelial cells suggests that the most significant genome variants occur in *Krt4*+ luminal cluster. (E, F) Cellchat analysis reveals differential strength of interaction (E) and top differential microenvironmental signaling (F) caused by deacetylation of *Klf5*.



## Supplemental Figure 4

A

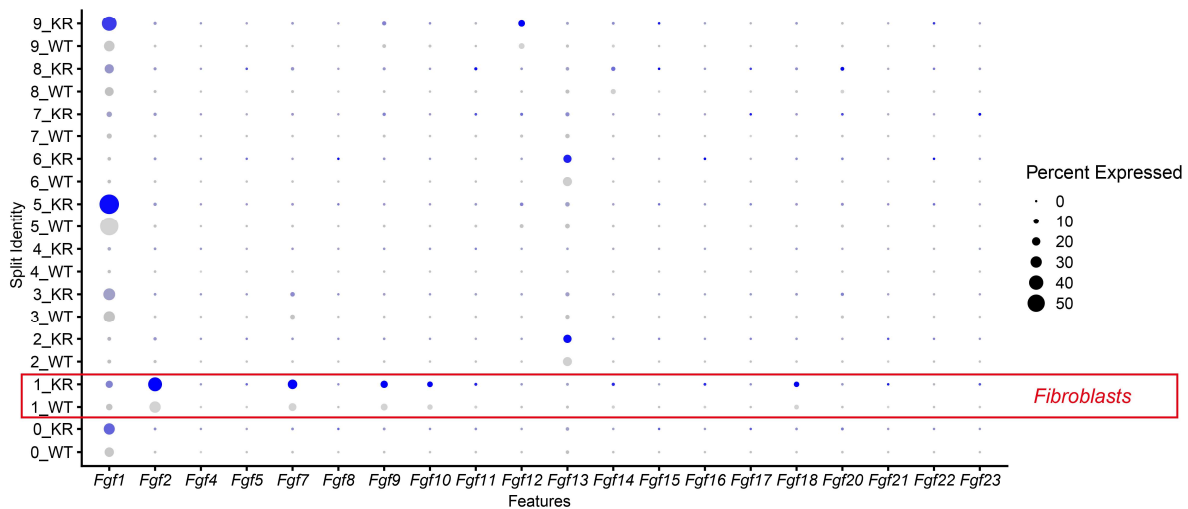

B

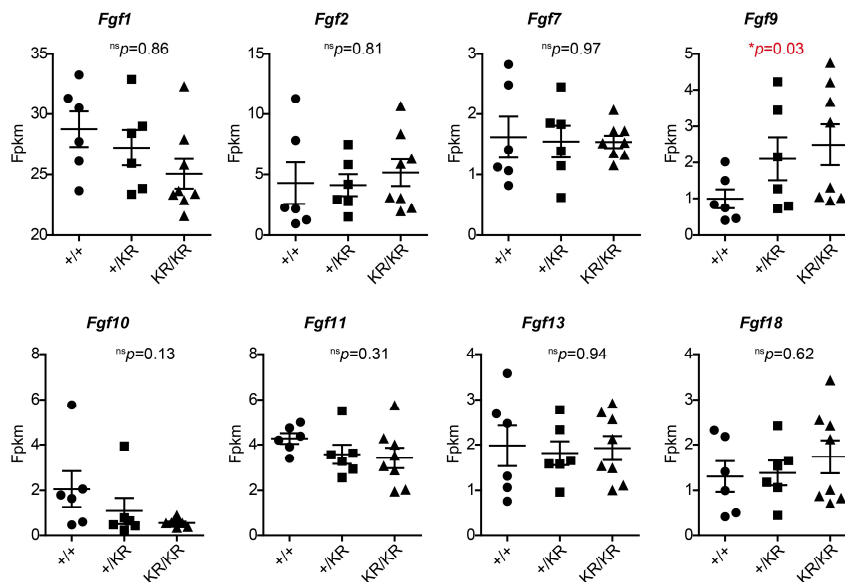

C

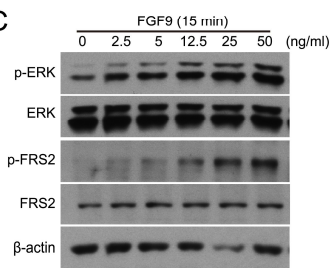

D

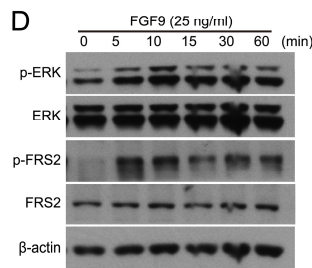

E

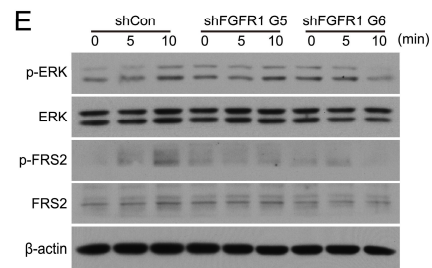

**Supplemental Figure 4. Fgf9 in fibroblasts is induced by Klf5 deacetylation in *Pten*-deficient prostate tumor cells and serves as a functional ligand of FGFR1. (A)** Dot plots of the Fgf expression in different cell clusters of mouse prostates, as indicated by scRNA-seq. Cluster numbers refer to the annotations in Fig. 4A. **(B)** The mRNA levels of Fgfs were determined by RNA-seq in mouse prostates with indicated genotypes. Only genes with Fpkms > 1, at least in one group, are shown. +/+, *PB<sup>Cre</sup>;Pten<sup>-/-</sup>;Klf5<sup>WT/WT</sup>*; +/KR, *PB<sup>Cre</sup>;Pten<sup>-/-</sup>;Klf5<sup>WT/KR</sup>*; KR/KR, *PB<sup>Cre</sup>;Pten<sup>-/-</sup>;Klf5<sup>KR/KR</sup>*. Data are shown in mean  $\pm$  S.E.M. **(C, D)** FGF9 induced the activation of FGFR1 signaling, as indicated by the Western blotting assay detecting p-ERK<sup>Thr202/Tyr204</sup> and p-FRS2<sup>Y436</sup>. DU 145 cells were treated as indicated in a dose curve **(C)** and a time curve **(D)**. **(E)** Silence of FGFR1 suppressed the activation of ERK and FRS2, as indicated by Western blotting. G5 and G6 are two different FGFR1 shRNAs. DU 145 cells were treated with FGF9 (25 ng/mL) as indicated time.

## Supplemental Figure 5

A

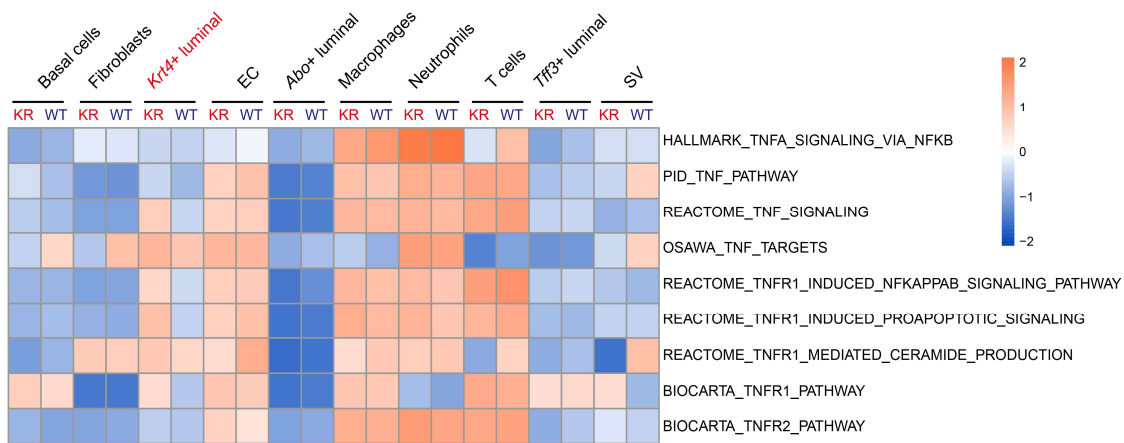

B

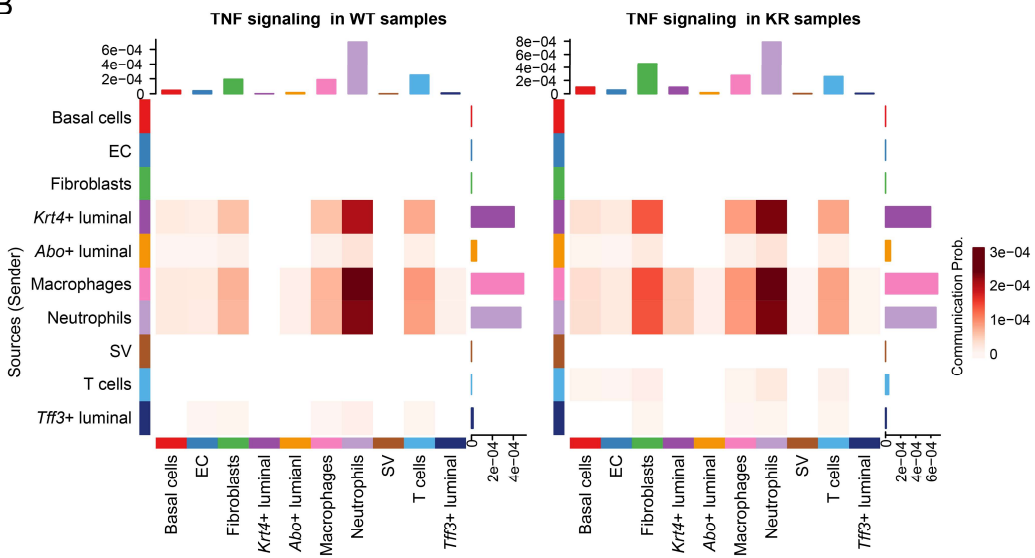

C

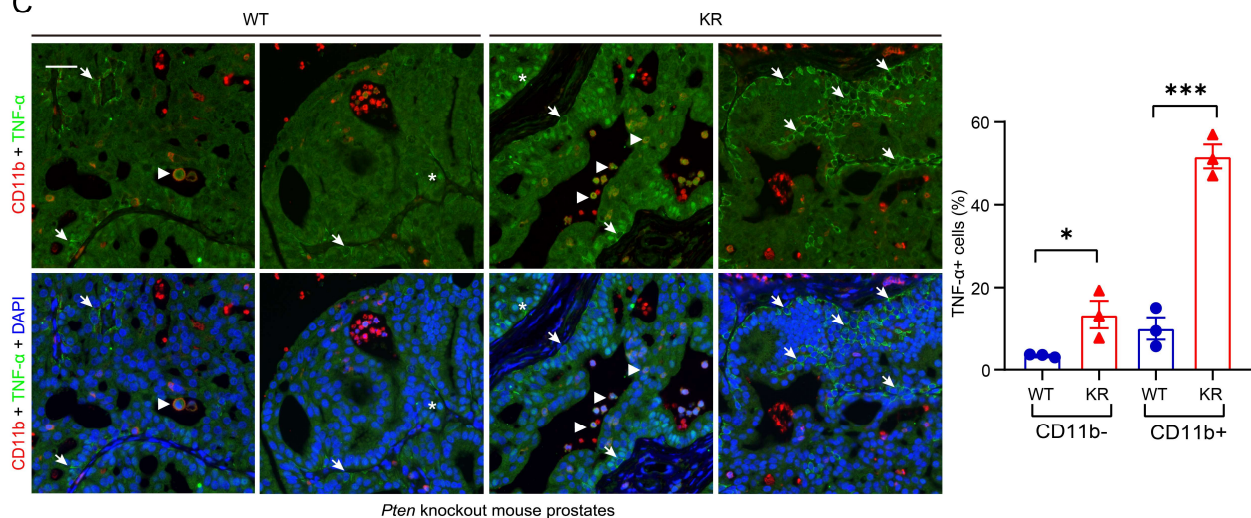

*Pten* knockout mouse prostates

### Supplemental Figure 5. *Klf5* deacetylation enhances TNF signaling in prostate tumor microenvironment.

(A) TNF signaling activities of each cell cluster were calculated by Gene Set Variation Analysis (GSVA) and plotted as a heatmap. TNF signaling related datasets were collected from MSigDB. (B) Fibroblasts in  $PB^{Cre};Pten^{-/-};Klf5^{KR/KR}$  (KR) group receives enhanced TNF signaling from *Krt4*+ luminal, macrophages and neutrophils relative to  $PB^{Cre};Pten^{-/-};Klf5^{WT/WT}$  (WT) group, as indicated by *Cellchat*. (C) TNF- $\alpha$  was enhanced by *Klf5*<sup>KR</sup> knockin in both epithelial cells and CD11b+ macrophages, as indicated by IF staining. Scale bars, 50  $\mu$ m. White arrowheads indicate CD11b+/TNF- $\alpha$ + cells. White arrows indicate CD11b-/TNF- $\alpha$ + cells. White stars indicate nuclear staining of TNF- $\alpha$ , which was excluded from the statistical analysis of TNF- $\alpha$ + cells on the right.

# Supplemental Figure 6

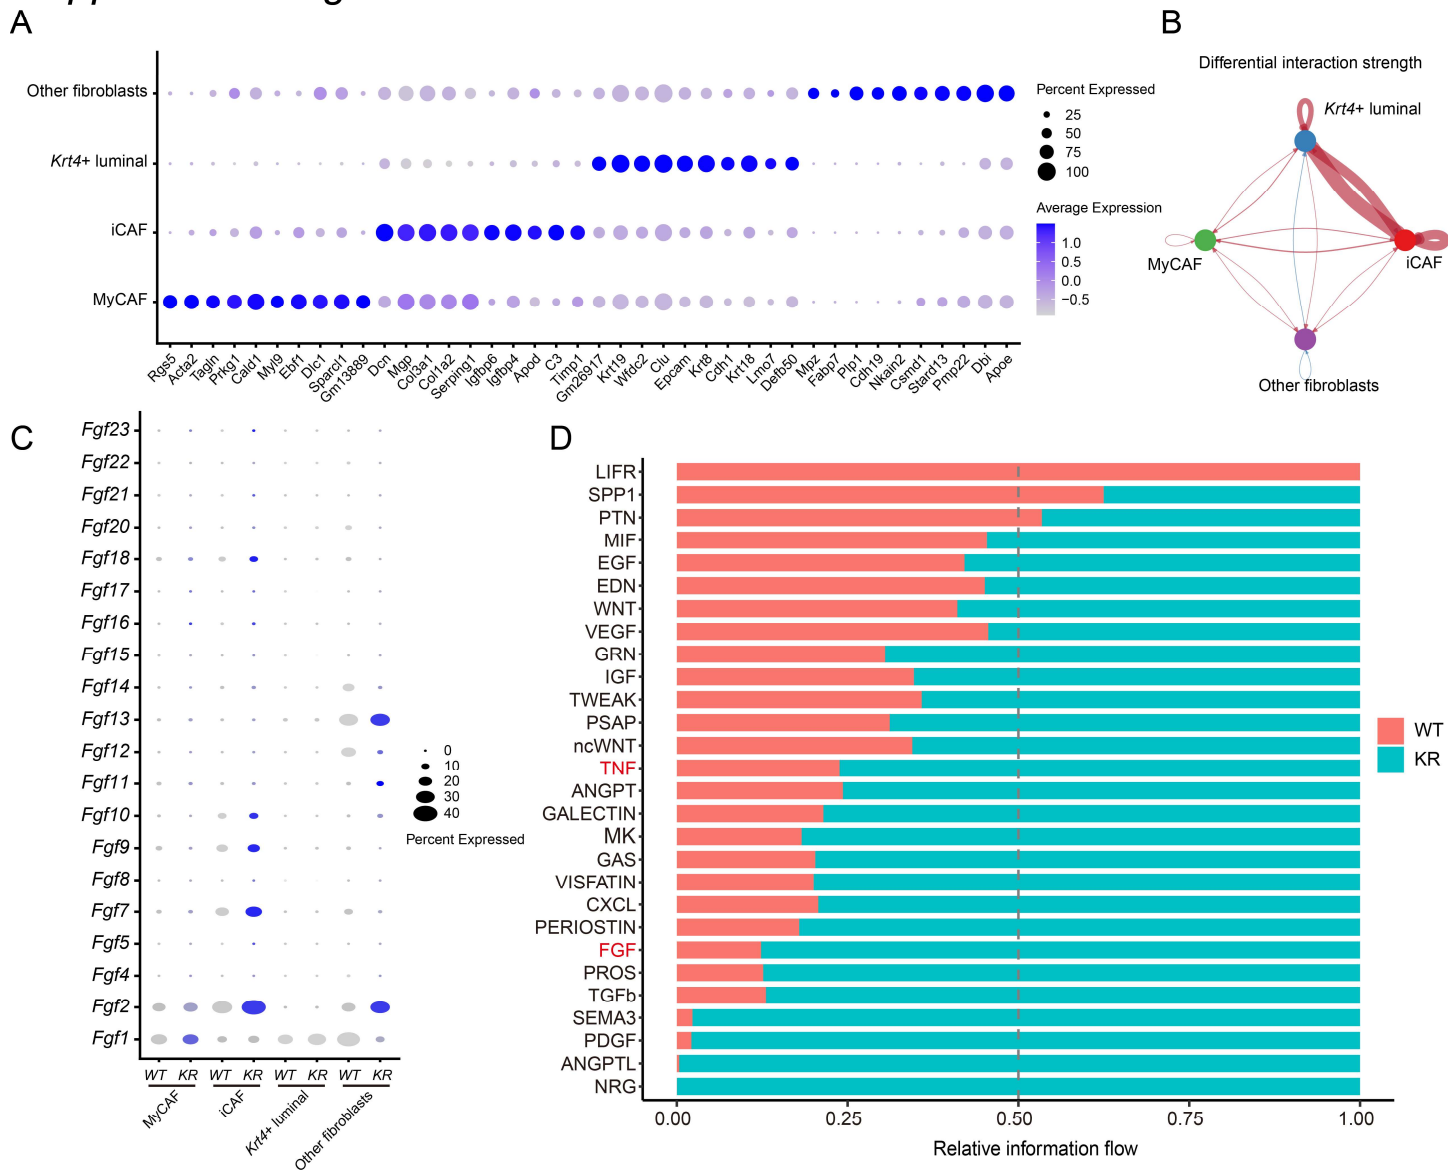

**Supplemental Figure 6. Klf5 deacetylation enhances signaling crosstalk between prostate cancer cells and iCAFs.** (A) Dot plots of top 10 marker genes of *Krt4+* luminal and different fibroblast clusters in scRNA-seq ( $n = 35343$  cells). (B) *KR* knockin enhances the strength of interaction between *Krt4+* luminal cells and iCAFs. (C) Dot plots of Fgfs in *Krt4+* luminal and different fibroblast clusters. (D) Top differential signaling crosstalk between *Krt4+* luminal and fibroblasts caused by *KR* knockin. *Cellchat* was used to generate panels B and D.



# Supplemental Figure 7

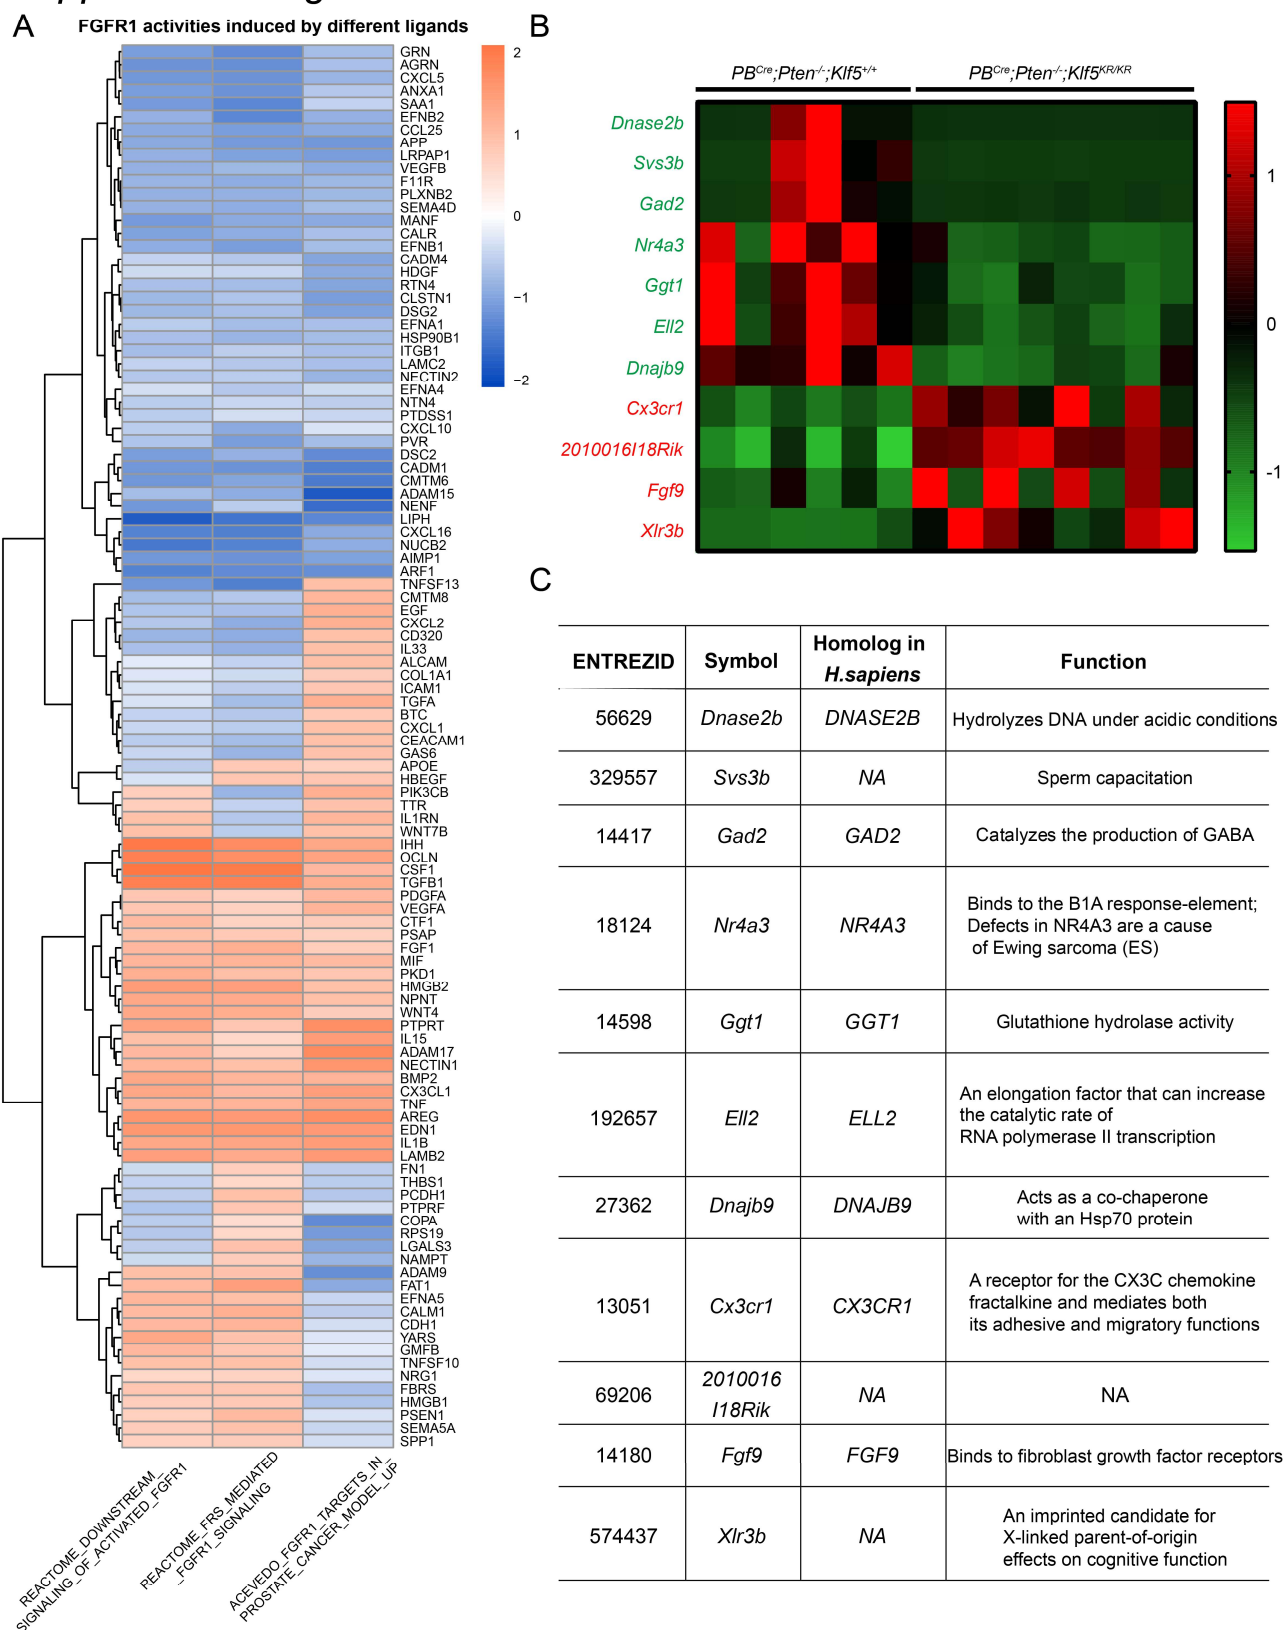

**Supplemental Figure 7. CX3CR1 induced by deacetylated Kif5 is a potential activator of FGFR1 signaling.** (A) A heatmap of FGFR1 activities induced by top differential ligands of *Krt4+* luminal autocrine signaling. *NicheNet* was used to calculate top differential ligands between KR and WT group in scRNA-seq. GSEA was used to evaluate the FGFR1 activities. (B, C) Consistent differentially expressed genes in anterior prostates (AP) and dorsal prostates (DP). The selected genes are with FDR < 0.05 in one lobe and *p* value < 0.01 in the other lobe. Their gene expression levels are shown in a heatmap (B) and their reported functions are summarized in a table (C).

# Supplemental Figure 8

A

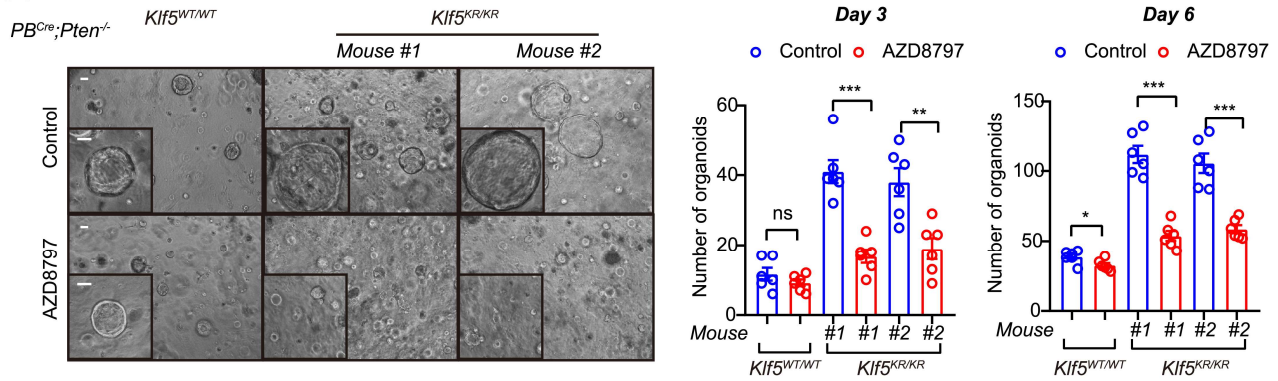

B

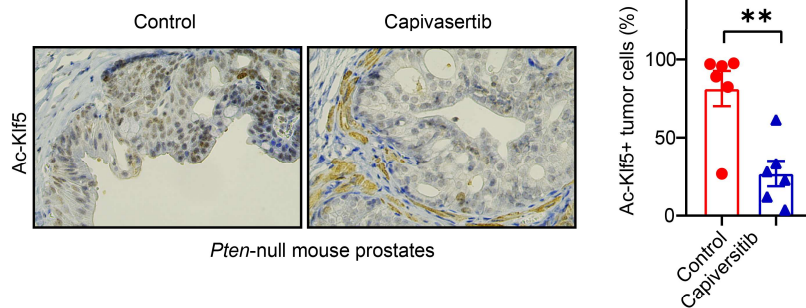

C

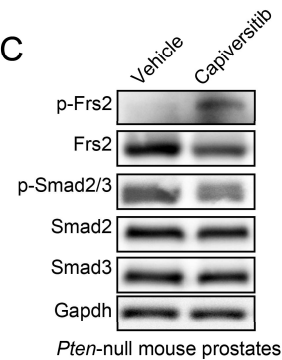

D

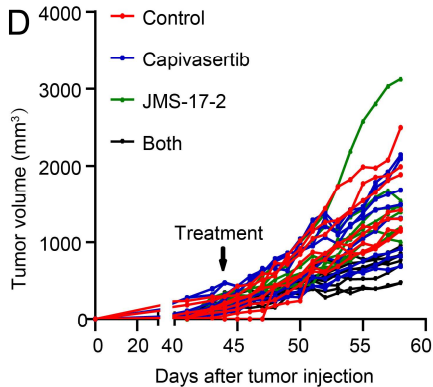

E

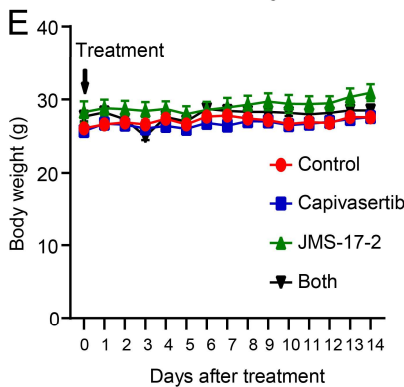

F

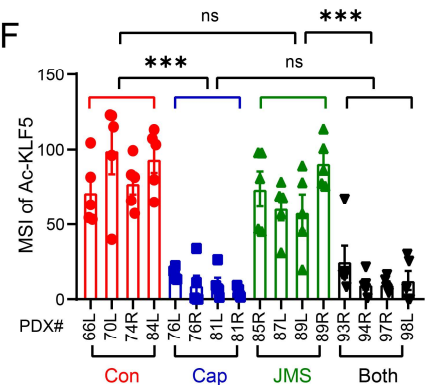

**Supplemental Figure 8. CX3CR1 inhibitor suppresses organoid formation and sensitizes PDX to AKT inhibitors.** (A) CX3CR1 inhibitor AZD8797 (50 nM) selectively suppresses the organoid formation of mouse prostate cancer cells with deAc-KLF5 in the context of *Pten* deficiency. Two-tailed Student's t-tests were performed. ns, not significant; \*,  $p < 0.05$ ; \*\*,  $p < 0.01$ ; \*\*\*,  $p < 0.001$ . (B, C) Treatment of *Pten* knockout GEMM by capivasertib suppressed TGF- $\beta$  signaling, reduced Ac-Klf5, and enhanced Frs2 phosphorylation, as indicated by IHC staining and Western blotting. (D) *Pten*-deficient PDXs on NSG mice were treated by AKT inhibitor capivasertib and/or CX3CR1 inhibitor JMS-17-2, as indicated in the figures daily. The tumor growth of PDX is shown as tumor volume curve for each PDX on NSG mice. (E) Body weight of NSG mice during therapy. (F) The expression levels of Ac-KLF5 were evaluated by quantitative analysis of mean staining intensities (MSI).

## Supplemental Figure 9

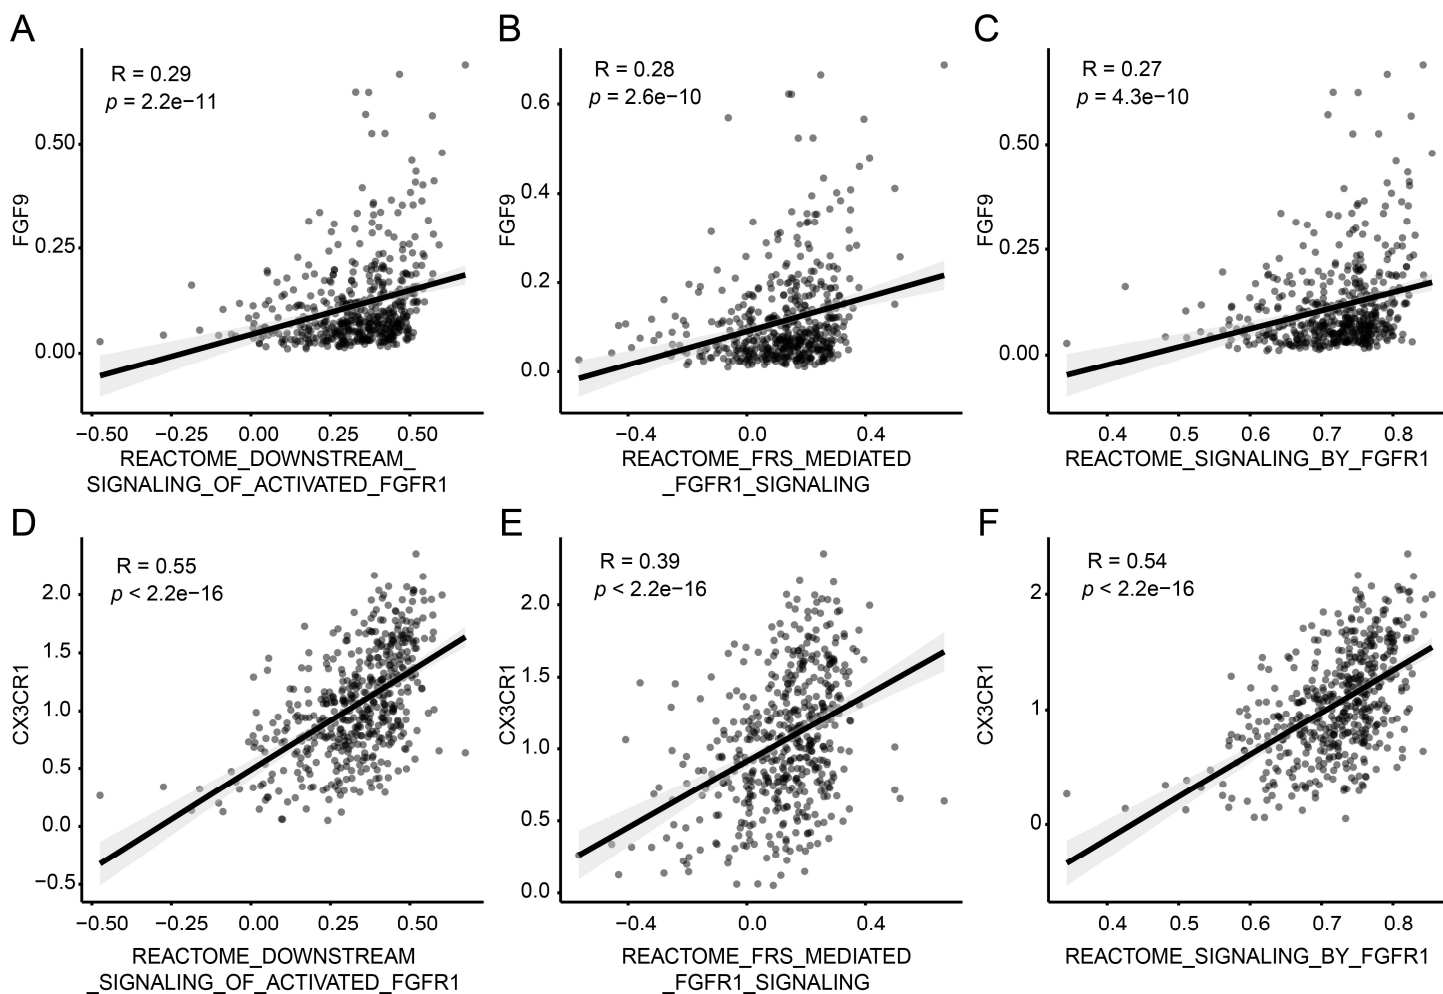

**Supplemental Figure 9. Correlation of FGF9 and CX3CR1 with FGFR1 activation in prostate cancer samples from TCGA database. (A-C)** Correlation of FGF9 and FGFR1 activation. **(D-F)** Correlation of CX3CR1 and FGFR1 activation. Single-sample geneset enrichment assay (ssGSEA) was used to identify the FGFR1 activation for 499 cancer samples by using three different REACTOME genesets. The gene expression levels of FGF9 and CX3CR1 were normalized into a z-score. Pearson analyses were performed in panels **A-F**.



## II. Supplemental Tables

Supplemental Table 1. Pathological features of p-AKT+ prostate cancer samples.

| ID  | Grade  | Stage  | CX3CR1    | FGF9 | p-FRS2 | CX3CR1                | FGF9  | p-FRS2 |
|-----|--------|--------|-----------|------|--------|-----------------------|-------|--------|
|     |        |        | IHC score |      |        | Average IHC intensity |       |        |
| A10 | I      | T2N0M0 | 1         | 2    | 1      | 0.160                 | 0.012 | 0.059  |
| A13 | II     | T2N0M0 | 2         | 0    | 0      | 0.019                 | 0.002 | 0.032  |
| B02 | III    | T2N0M0 | 0         | 0    | 0      | 0.004                 | 0.007 | 0.000  |
| B03 | III    | T3N0M0 | 1         | 0    | 1      | 0.291                 | 0.000 | 0.008  |
| B04 | II     | T2N0M0 | 1         | 0    | 1      | 0.029                 | 0.003 | 0.016  |
| B06 | III    | T2N0M0 | 0         | 1    | 1      | 0.023                 | 0.150 | 0.009  |
| B07 | II~III | T2N0M0 | 3         | 2    | 0      | 0.091                 | 0.046 | 0.031  |
| B08 | II~III | T1N0M0 | 1         | 3    | 0      | 0.037                 | 0.126 | 0.022  |
| B10 | I      | T2N0M0 | 3         | 1    | 2      | 0.355                 | 0.035 | 0.071  |
| C03 | III    | T1N0M0 | 2         | 0    | 0      | 0.028                 | 0.000 | 0.004  |
| C06 | III    | T2N0M0 | 0         | 0    | 1      | 0.000                 | 0.001 | 0.058  |
| C07 | III    | T2N0M0 | 2         | 1    | 4      | 0.014                 | 0.030 | 0.478  |
| D04 | II     | T2N0M0 | 2         | 2    | 1      | 0.059                 | 0.088 | 0.031  |
| D05 | III    | T2N0M0 | 1         | 0    | 0      | 0.054                 | 0.011 | 0.002  |
| D07 | III    | T2N0M0 | 2         | 2    | 0      | 0.114                 | 0.028 | 0.005  |
| D08 | III    | T2N0M0 | 1         | 1    | 1      | 0.010                 | 0.089 | 0.001  |
| D10 | I      | T4N0M0 | 2         | 2    | 1      | 0.415                 | 0.195 | 0.018  |
| E02 | III    | T2N0M0 | 3         | 3    | 0      | 0.083                 | 0.098 | 0.011  |
| E08 | II     | T2N0M0 | 3         | 1    | 1      | 0.172                 | 0.002 | 0.005  |
| E10 | II     | T2N0M0 | 3         | 3    | 0      | 0.006                 | 0.048 | 0.012  |
| F04 | III    | T2N0M0 | 2         | 0    | 1      | 0.022                 | 0.005 | 0.022  |
| F07 | I      | T2N0M0 | 2         | 0    | 1      | 0.211                 | 0.029 | 0.091  |
| F08 | II     | T1N0M0 | 3         | 2    | 3      | 0.350                 | 0.048 | 0.051  |
| G01 | II     | T2N0M0 | 2         | 2    | 3      | 0.075                 | 0.001 | 0.007  |
| G12 | III    | T4N0M0 | 2         | 3    | 3      | 0.172                 | 0.040 | 0.041  |
| H02 | II     | T2N0M0 | 0         | 2    | 0      | 0.001                 | 0.002 | 0.001  |
| H04 | III    | T2N0M0 | 4         | 3    | 0      | 1.783                 | 0.110 | 0.054  |
| H11 | III    | T2N0M0 | 3         | 2    | 1      | 0.419                 | 0.094 | 0.060  |

**Note:**

The expression levels of CX3CR1, TNF, FGF9, and p-FRS2 were determined by IHC staining. The below criteria were used for grading the IHC images: “0”, none; “1”, 1–25%; “2”, 26–50%; “3”, 51–75%; and “4”, 76–100% cells stained. Two representative images per sample were used for quantitative analysis, and the average intensity of IHC staining images was calculated by Image J software.

**Supplemental Table 2. Clinical parameters of patient samples in tissue microarray PRC1021.**

| <b>Position</b> | <b>Sex</b> | <b>Age</b> | <b>Anatomic Site</b> | <b>Pathology</b> | <b>Grade</b> | <b>Stage</b> |
|-----------------|------------|------------|----------------------|------------------|--------------|--------------|
| A06             | M          | 60         | Prostate             | Adenocarcinoma   | II           | T2N0M0       |
| A08             | M          | 72         | Prostate             | Adenocarcinoma   | III          | T2N0M0       |
| A09             | M          | 63         | Prostate             | Adenocarcinoma   | II           | T2N0M0       |
| A10             | M          | 76         | Prostate             | Adenocarcinoma   | I            | T2N0M0       |
| A11             | M          | 82         | Prostate             | Adenocarcinoma   | III          | T2N0M0       |
| A13             | M          | 77         | Prostate             | Adenocarcinoma   | II           | T2N0M0       |
| B01             | M          | 72         | Prostate             | Adenocarcinoma   | III          | T2N0M0       |
| B02             | M          | 78         | Prostate             | Adenocarcinoma   | III          | T2N0M0       |
| B03             | M          | 74         | Prostate             | Adenocarcinoma   | III          | T3N0M0       |
| B04             | M          | 69         | Prostate             | Adenocarcinoma   | II           | T2N0M0       |
| B05             | M          | 73         | Prostate             | Adenocarcinoma   | III          | T2N0M0       |
| B06             | M          | 73         | Prostate             | Adenocarcinoma   | III          | T2N0M0       |
| B07             | M          | 77         | Prostate             | Adenocarcinoma   | II~III       | T2N0M0       |
| B08             | M          | 77         | Prostate             | Adenocarcinoma   | II~III       | T1N0M0       |
| B09             | M          | 77         | Prostate             | Adenocarcinoma   | III          | T2N0M0       |
| B10             | M          | 62         | Prostate             | Adenocarcinoma   | I            | T2N0M0       |
| B12             | M          | 67         | Prostate             | Adenocarcinoma   | II           | T2N0M0       |
| B13             | M          | 73         | Prostate             | Adenocarcinoma   | II           | T2N0M0       |
| C01             | M          | 74         | Prostate             | Adenocarcinoma   | I~II         | T2N0M1       |
| C02             | M          | 70         | Prostate             | Adenocarcinoma   | III          | T2N0M0       |
| C03             | M          | 66         | Prostate             | Adenocarcinoma   | III          | T1N0M0       |
| C04             | M          | 75         | Prostate             | Adenocarcinoma   | III          | T2N0M0       |
| C06             | M          | 78         | Prostate             | Adenocarcinoma   | III          | T2N0M0       |
| C07             | M          | 79         | Prostate             | Adenocarcinoma   | III          | T2N0M0       |
| C08             | M          | 69         | Prostate             | Adenocarcinoma   | I            | T1N0M0       |
| C09             | M          | 51         | Prostate             | Adenocarcinoma   | II           | T3N1M0       |
| C13             | M          | 54         | Prostate             | Adenocarcinoma   | II           | T1N0M0       |
| D01             | M          | 81         | Prostate             | Adenocarcinoma   | III          | T2N0M0       |
| D02             | M          | 79         | Prostate             | Adenocarcinoma   | II           | T2N0M0       |
| D04             | M          | 77         | Prostate             | Adenocarcinoma   | II           | T2N0M0       |
| D05             | M          | 73         | Prostate             | Adenocarcinoma   | III          | T2N0M0       |
| D06             | M          | 68         | Prostate             | Adenocarcinoma   | III          | T2N0M0       |
| D07             | M          | 78         | Prostate             | Adenocarcinoma   | III          | T2N0M0       |
| D08             | M          | 87         | Prostate             | Adenocarcinoma   | III          | T2N0M0       |
| D10             | M          | 77         | Prostate             | Adenocarcinoma   | I            | T4N0M0       |
| D11             | M          | 85         | Prostate             | Adenocarcinoma   | III          | T2N0M0       |
| D12             | M          | 84         | Prostate             | Adenocarcinoma   | III          | T2N0M0       |
| D13             | M          | 71         | Prostate             | Adenocarcinoma   | III          | T2N0M0       |
| E01             | M          | 73         | Prostate             | Adenocarcinoma   | III          | T1N0M0       |
| E02             | M          | 66         | Prostate             | Adenocarcinoma   | III          | T2N0M0       |
| E04             | M          | 86         | Prostate             | Adenocarcinoma   | II           | T2N0M0       |
| E05             | M          | 75         | Prostate             | Adenocarcinoma   | III          | T2N0M0       |
| E06             | M          | 75         | Prostate             | Adenocarcinoma   | II           | T2N0M0       |

|     |   |    |          |                |     |        |
|-----|---|----|----------|----------------|-----|--------|
| E07 | M | 80 | Prostate | Adenocarcinoma | III | T2N0M0 |
| E08 | M | 71 | Prostate | Adenocarcinoma | II  | T2N0M0 |
| E09 | M | 52 | Prostate | Adenocarcinoma | III | T2N0M0 |
| E10 | M | 73 | Prostate | Adenocarcinoma | II  | T2N0M0 |
| E11 | M | 73 | Prostate | Adenocarcinoma | II  | T2N0M0 |
| E12 | M | 76 | Prostate | Adenocarcinoma | II  | T2N0M0 |
| E13 | M | 67 | Prostate | Adenocarcinoma | II  | T2N0M0 |
| F01 | M | 76 | Prostate | Adenocarcinoma | II  | T1N0M0 |
| F02 | M | 60 | Prostate | Adenocarcinoma | III | T2N0M0 |
| F03 | M | 74 | Prostate | Adenocarcinoma | I   | T2N0M0 |
| F04 | M | 73 | Prostate | Adenocarcinoma | III | T2N0M0 |
| F05 | M | 83 | Prostate | Adenocarcinoma | II  | T2N0M0 |
| F07 | M | 67 | Prostate | Adenocarcinoma | I   | T2N0M0 |
| F08 | M | 54 | Prostate | Adenocarcinoma | II  | T1N0M0 |
| F09 | M | 68 | Prostate | Adenocarcinoma | I   | T2N0M0 |
| F10 | M | 82 | Prostate | Adenocarcinoma | II  | T1N0M0 |
| F11 | M | 59 | Prostate | Adenocarcinoma | II  | T4N0M0 |
| F12 | M | 67 | Prostate | Adenocarcinoma | I   | T2N0M0 |
| F13 | M | 86 | Prostate | Adenocarcinoma | III | T4N0M0 |
| G01 | M | 75 | Prostate | Adenocarcinoma | II  | T2N0M0 |
| G04 | M | 80 | Prostate | Adenocarcinoma | II  | T2N0M0 |
| G05 | M | 71 | Prostate | Adenocarcinoma | III | T3N0M0 |
| G06 | M | 67 | Prostate | Adenocarcinoma | II  | T2N0M0 |
| G07 | M | 64 | Prostate | Adenocarcinoma | III | T2N0M0 |
| G08 | M | 73 | Prostate | Adenocarcinoma | III | T2N0M0 |
| G09 | M | 71 | Prostate | Adenocarcinoma | III | T1N0M0 |
| G10 | M | 66 | Prostate | Adenocarcinoma | III | T4N0M0 |
| G12 | M | 87 | Prostate | Adenocarcinoma | III | T4N0M0 |
| H01 | M | 61 | Prostate | Adenocarcinoma | III | T2N0M0 |
| H02 | M | 86 | Prostate | Adenocarcinoma | II  | T2N0M0 |
| H04 | M | 68 | Prostate | Adenocarcinoma | III | T2N0M0 |
| H05 | M | 64 | Prostate | Adenocarcinoma | II  | T4N1M0 |
| H06 | M | 78 | Prostate | Adenocarcinoma | II  | T2N0M0 |
| H07 | M | 72 | Prostate | Adenocarcinoma | II  | T2N0M0 |
| H08 | M | 75 | Prostate | Adenocarcinoma | III | T2N0M0 |
| H09 | M | 80 | Prostate | Adenocarcinoma | III | T2N0M0 |
| H10 | M | 77 | Prostate | Adenocarcinoma | III | T2N0M0 |
| H11 | M | 69 | Prostate | Adenocarcinoma | III | T2N0M0 |
| H12 | M | 60 | Prostate | Adenocarcinoma | I   | T2N0M0 |

**Note:**

Adenocarcinoma samples with intact IHC staining are using in this study and their pathological data are listed.



**Supplemental Table 3. Primers used for realtime qPCR.**

| <b>Primer name</b> | <b>Primer sequences</b> |
|--------------------|-------------------------|
| Mouse-Fgf9-for     | ATGGCTCCCTTAGGTGAAGTT   |
| Mouse-Fgf9-rev     | TCATTTAGCAACACCGGACTG   |
| Human-TNF-for      | GAGGCCAAGCCCTGGTATG     |
| Human-TNF-rev      | CGGGCCGATTGATCTCAGC     |
| Human-CX3CR1-for   | AGTGTCACCGACATTTACCTCC  |
| Human-CX3CR1-rev   | AAGGCGGTAGTGAATTTGCAC   |
| Human-GAPDH-for    | GGTGGTCTCCTCTGACTTCAACA |
| Human-GAPDH-rev    | GTTGCTGTAGCCAAATTCGTTGT |

**Supplemental Table 4. Antibodies used in this study.**

| <b>ANTIBODIES</b>                                   | <b>SOURCE</b>             | <b>CATALOG NUMBER</b> | <b>APPLICATION</b>     |
|-----------------------------------------------------|---------------------------|-----------------------|------------------------|
| Ki67                                                | Abcam                     | ab15580               | IHC: 1/3000            |
| pAKT                                                | Cell Signaling Technology | 4060S                 | WB: 1/1500; IHC: 1/200 |
| pERK                                                | Cell Signaling Technology | 4370S                 | WB: 1/1500; IHC: 1/300 |
| pFRS2                                               | R&D SYSTEMS               | AF5126                | IHC: 1/50              |
| FGF9                                                | Santa Cruz                | sc-8413               | IHC: 1/200             |
| pSMAD2/3                                            | ABclonal                  | AP0548                | WB: 1/1500; IHC: 1/200 |
| Ac-KLF5*                                            | /                         | /                     | IHC: 1/250             |
| KLF5*                                               | /                         | /                     | IHC: 1:1000            |
| Ck5                                                 | Abcam                     | ab52635               | IHC: 1/200             |
| Ck8                                                 | Abcam                     | ab53280               | IHC: 1/200             |
| CX3CR1                                              | Abcam                     | ab8020                | WB: 1/1500; IHC: 1/100 |
| TNF-a                                               | Proteintech               | 60291-1-1g            | IF: 1/100; IHC: 1/200  |
| CD11b                                               | Abcam                     | ab133357              | IF: 1/100              |
| DyLight594 Goat anti Rabbit IgG                     | Abbkine                   | A23420                | IF: 1/500              |
| DyLight488 Goat anti Mouse IgG                      | Abbkine                   | A23210                | IF: 1/500              |
| AKT                                                 | Cell Signaling Technology | 4691S                 | WB: 1/3000             |
| ERK                                                 | Cell Signaling Technology | 4695S                 | WB: 1/3000             |
| pFRS2                                               | Cell Signaling Technology | 3861S                 | WB: 1/1000             |
| FRS2                                                | Santa Cruz                | sc-17841              | WB: 1/500              |
| Smad2                                               | Cell Signaling Technology | 5339T                 | WB: 1/2000             |
| Smad3                                               | Cell Signaling Technology | 9523T                 | WB: 1/2000             |
| GAPDH                                               | Proteintech               | 60004-1-1g            | WB: 1/3000             |
| $\beta$ -Actin                                      | Proteintech               | 66009-1-1g            | WB: 1/3000             |
| HRP-conjugated Affinipure Goat Anti-Rabbit IgG(H+L) | Proteintech               | SA00001-2             | WB: 1/3000             |
| HRP-conjugated Affinipure Goat Anti-Mouse IgG(H+L)  | Proteintech               | SA00001-1             | WB: 1/3000             |

\* Antibodies specific for Ac-KLF5 and KLF5 were established in our previous study(1, 2).

### III. Supplemental Datasets

**Supplemental Dataset 1. RNA-seq analysis of differentially expressed genes in anterior prostates.** WW,  $PB^{Cre};Pten^{-/-};Klf5^{WT/WT}$ , n=3 mice; KRW,  $PB^{Cre};Pten^{-/-};Klf5^{WT/KR}$ , n=3 mice; KRKR,  $PB^{Cre};Pten^{-/-};Klf5^{KR/KR}$ , n=4 mice.

**Supplemental Dataset 2. RNA-seq analysis of differentially expressed genes in dorsal prostates.** WW,  $PB^{Cre};Pten^{-/-};Klf5^{WT/WT}$ , n=3 mice; KRW,  $PB^{Cre};Pten^{-/-};Klf5^{WT/KR}$ , n=3 mice; KRKR,  $PB^{Cre};Pten^{-/-};Klf5^{KR/KR}$ , n=4 mice.

**Supplemental Dataset 3. Significant marker genes in different seurat clusters in scRNA-seq of mouse prostates.** Marker genes are filtered as below: adjust p-value < 0.05, average fold change > 1.5, pct.1 > 0.4, differential pct > 0.2.

**Supplemental Dataset 4. Top ligands in *NicheNet* analysis for the autocrine signaling in *Krt4+* luminal cells.** Differential ligands after KR knockin were analyzed by *NicheNet* for the autocrine signaling of *Krt4+* luminal cells. Their receptors are summarized and their capabilities in activating FGFR1 signaling was evaluated by GSVA.

## IV. Supplemental Methods

### Mouse prostate collection and histological processing

Mice with indicated genotypes were euthanized and a mixture of prostate, urethra, bladder and surrounding connective tissues was isolated. The prostate was then dissected from the mixture in PBS and the wet weights of prostates were measured immediately. Prostate tissues were fixed in 10% neutral buffered formalin overnight, transferred to 70% ethanol, embedded in paraffin, sectioned at 5  $\mu$ m, and stained with hematoxylin and eosin (H&E) at the Research Pathology Core Lab at the Winship Cancer Institute. The H&E staining slides were further evaluated by urologic pathology expert Dr. Adeboye O. Osunkoya from Emory University.

### RNA-seq analyses

Anterior and dorsal prostates of *PB<sup>Cre</sup>;Pten<sup>-/-</sup>;Klf5<sup>KR/KR</sup>* and *PB<sup>Cre</sup>;Pten<sup>-/-</sup>;Klf5<sup>+/+</sup>* mice were dissected freshly for RNA isolation at the Emory Integrated Genomics Core and proceeded to library construction and RNA-Seq at Novogene (Sacramento, CA) using paired-end 150 bp reads on a NovaSeq.

FASTQ files from sequencing were quality controlled and adapter trimmed using FASTQC (v0.11.5) and mapped to MM10 reference genome using the STAR aligner (v2.5.0a) (3). Putative PCR duplicates were marked and removed with SAMtools (v1.7) for downstream analysis (4). Gene expression levels were determined by the number of fragments per kilobase per million reads (FPKM), similar to a previously described procedure (5). Briefly, reads overlapping exonic regions of UCSC MM10 known genes were determined using the 'summarizeOverlaps' function of the 'GenomicAlignments' (v1.20.1) package in the R/Bioconductor (v3.6.1). DEGs were determined using edgeR (v3.26.5) with an FDR  $\leq 0.05$  determining significance (6). FPKM and DEGs were provided in Supplemental Dataset 1-2.

Functional annotations of differential gene expression caused by deacetylated Klf5 in *Pten*-deficient prostate cancer were using Gene Ontology (GO) analysis for enriched biological processes. DOSE R package was used for generating central network plot (CNET plot) to indicate the most significantly enriched GO biological processes and their associated genes (7).

### scRNA-seq analysis

Cell Ranger toolkit (v6.0.2) were used to perform de-multiplexing and alignment to the mm10 transcriptome. Default parameters were used to trim the adaptor sequence and remove the low quality reads. The raw output data were processed with the Seurat package (v4.3.0) in R software (v4.1.3) for each individual sample. Further quality control were used to filter cells to those with fewer than 20% mitochondrial RNA content, fewer than 5% red blood cell content, more than 200 unique molecular identifiers (UMI) counts, fewer than 10,000 UMI counts and more than 1000 total number of molecules detected within a cell. A total of 61713 cells from four scRNA-seq samples were combined and used for further bioinformatic analysis.

The gene expression was normalized by using “LogNormalize” method with a scale factor of 10,000. The top 3,000 highly variable genes (HVGs) were identified by using a selection method of “vst”, centered and scaled before principal component analysis (PCA) based on these HVGs. The batch effects were removed by Harmony (v0.1.1) based on the top 15 PCA components identified.

The clusters was further analyzed by using “FindClusters” function of the Seurat package with a optimized resolution of 0.07. The identified clusters were visualized on the 2D map produced with the UMAP method. For sub-clustering analysis, we applied a similar procedure including the variable genes identification, dimension reduction, cell integration with Harmony and the clustering identification to the restricted cluster derived from the overall analysis.

To annotate the cell clusters, marker genes of each cluster with high discrimination abilities among the groups were identified with the FindAllMarkers function in Seurat using the default non-parametric Wilcoxon rank sum test. The cell groups were annotated based on the marker genes and the well-known cellular markers from the literatures (8, 9). Detailed information of the marker genes of each cluster was provided in Supplemental dataset 3.

Subsets with luminal cell markers (cluster 0, 3, 8) were further estimated for their single cell copy number variations (CNVs). Single cell CNVs were estimated with the inferCNV packages (v1.16.0) (10). The inferCNV analysis was performed with parameters including “denoise”, a value of 0.1 for “cutoff”, none group reference, and a “ward.D2” method for hierarchical clustering of cells.

The single-cell pseudotime trajectories of Fibroblast subset were generated with the Monocle2 package (v2.22.0) in R (11). Only genes with the mean expression  $\geq 0.02$  were used in the trajectory analysis. The



dimension was reduced by using the parameters “DDRTree” as reduction method and 2 as max components. Genes that changed along with the pseudotime were calculated and visualized by using `plot_cell_trajectory` function, and then colored by the normalized expression levels of these genes.

CellChat (v1.6.1) was used for analyzing cell-cell communications based on the secreted signaling database (CellChat DB) (12). Briefly, normalized gene expression matrices of cell clusters of interest were input into CellChat. The differential interaction numbers and strengths between genotypes were calculated by the `compareInteractions` function. The heatmap of communication probabilities of a specific signaling was computed by `netVisual_heatmap` function and reorganized by Graphpad software according to the communication probabilities. Top differential ligands for the microenvironmental crosstalk of particular interest was calculated by NicheNet (v1.1.1) (13).

### **Real-time qPCR**

Cultured cells at indicated conditions were lysed in the Trizol reagent (Invitrogen) for RNA isolation according to the manufacturer’s instructions. The cDNAs for mRNA expression analysis were synthesized from total RNA using RT-PCR kits from Promega (Madison, WI). Realtime qPCR primers are listed in Supplemental Table 3.

### **Enzyme linked immunosorbent assay (ELISA)**

Expression levels of TNF- $\alpha$  and Fgf9 in the conditioned media were detected by ELISA according to their respective manufacturer’s instructions. The supernatants of cell cultures were stored at -80°C freezer for less than a week. Human TNF alpha ELISA Kit (Thermo Fisher, cat# BMS223HS) was used for detecting TNF- $\alpha$ . Mouse Fgf9 ELISA kit (MYBIOSOURCE, San Diego, CA, cat# MBS2708203) was used for detecting Fgf9.

### **Organoid culture**

Prostate cancer organoid culture was performed following established procedures (14). Briefly, mouse prostate cancer cells were dissected and digested by 5 mg/mL collagenase II (Thermo Fisher, # 17101015) for 1.5 hours at 37°C, digested to single cells by TrypLE (Life Technologies, # 12605-010), and then filtered with a 40  $\mu$ m cell strainer. Twenty thousand cells were seeded in 40  $\mu$ L Matrigel (BD, #356231) onto prewarmed 8-well chamber slides. The culture media contained 50x diluted B27, 1.25 mM N-acetylcysteine, 50 ng/mL EGF, 100

ng/mL Noggin, 500 ng/mL R-Spondin, 200 nM A83-01, 1nM DHT and 10  $\mu$ M Y27632. After 3-6 days of culture, the total number of organoids was counted and analyzed.

## Reference

1. Xing C, Fu X, Sun X, Guo P, Li M, and Dong JT. Different expression patterns and functions of acetylated and unacetylated Klf5 in the proliferation and differentiation of prostatic epithelial cells. *PLoS One*. 2013;8(6):e65538.
2. Chen C, Sun X, Ran Q, Wilkinson KD, Murphy TJ, Simons JW, et al. Ubiquitin-proteasome degradation of KLF5 transcription factor in cancer and untransformed epithelial cells. *Oncogene*. 2005;24(20):3319-27.
3. Dobin A, Davis CA, Schlesinger F, Drenkow J, Zaleski C, Jha S, et al. STAR: ultrafast universal RNA-seq aligner. *Bioinformatics*. 2013;29(1):15-21.
4. Li H, Handsaker B, Wysoker A, Fennell T, Ruan J, Homer N, et al. The Sequence Alignment/Map format and SAMtools. *Bioinformatics*. 2009;25(16):2078-9.
5. Barwick BG, Scharer CD, Bally APR, and Boss JM. Plasma cell differentiation is coupled to division-dependent DNA hypomethylation and gene regulation. *Nat Immunol*. 2016;17(10):1216-25.
6. Robinson MD, McCarthy DJ, and Smyth GK. edgeR: a Bioconductor package for differential expression analysis of digital gene expression data. *Bioinformatics*. 2010;26(1):139-40.
7. Yu G, Wang LG, Yan GR, and He QY. DOSE: an R/Bioconductor package for disease ontology semantic and enrichment analysis. *Bioinformatics*. 2015;31(4):608-9.
8. Guo W, Li L, He J, Liu Z, Han M, Li F, et al. Single-cell transcriptomics identifies a distinct luminal progenitor cell type in distal prostate invagination tips. *Nat Genet*. 2020;52(9):908-18.
9. Chan JM, Zaidi S, Love JR, Zhao JL, Setty M, Wadosky KM, et al. Lineage plasticity in prostate cancer depends on JAK/STAT inflammatory signaling. *Science*. 2022;377(6611):1180-91.
10. Patel AP, Tirosh I, Trombetta JJ, Shalek AK, Gillespie SM, Wakimoto H, et al. Single-cell RNA-seq highlights intratumoral heterogeneity in primary glioblastoma. *Science*. 2014;344(6190):1396-401.
11. Trapnell C, Cacchiarelli D, Grimsby J, Pokharel P, Li S, Morse M, et al. The dynamics and regulators of cell fate decisions are revealed by pseudotemporal ordering of single cells. *Nat Biotechnol*. 2014;32(4):381-6.
12. Jin S, Guerrero-Juarez CF, Zhang L, Chang I, Ramos R, Kuan CH, et al. Inference and analysis of cell-cell communication using CellChat. *Nature communications*. 2021;12(1):1088.

13. Browaeys R, Saelens W, and Saeys Y. NicheNet: modeling intercellular communication by linking ligands to target genes. *Nat Methods*. 2020;17(2):159-62.
14. Drost J, Karthaus WR, Gao D, Driehuis E, Sawyers CL, Chen Y, et al. Organoid culture systems for prostate epithelial and cancer tissue. *Nat Protoc*. 2016;11(2):347-58.
